# Supplementary material for: Incidence of and Neurodevelopmental Outcomes After Late-Onset Meningitis Among Children Born Extremely Preterm
Source: PubMed Central journal article supplement (PMC9856224; doi:10.1001/jamanetworkopen.2022.45826), 2022-12-08
Supplement: jamanetwopen-e2245826-s001.pdf [file jamanetwopen-e2245826-s001.pdf]

## Supplemental Online Content

Brumbaugh JE, Bell EF, Do BT, et al; Eunice Kennedy Shriver National Institute of Child Health and Human Development Neonatal Research Network. Incidence of and neurodevelopmental outcomes after late-onset meningitis among children born extremely preterm. *JAMA Netw Open*. 2022;5(12):e2245826. doi:10.1001/jamanetworkopen.2022.45826

**eTable 1.** Newborn Hospitalization Morbidities and Outcomes

**eTable 2.** Logistic Regression Model for Risk of Late-Onset Meningitis

**eTable 3.** Distribution of Pathogens Identified in Cerebrospinal Fluid

**eTable 4.** Rate of Lumbar Puncture Performance by Late-Onset Sepsis Pathogen, 2011-2017

**eTable 5.** Logistic Regression Models for Risk of Neurodevelopmental Impairment or Death

**eTable 6.** Outcomes at 18 to 26 Months' Corrected Age by Late-Onset Meningitis Pathogen Classification

**eFigure 1.** Incidence of Detected Late-Onset Meningitis by Center (2003-2017)

**eFigure 2.** Incidence of Lumbar Puncture (LP) in Late-Onset Sepsis Evaluations by Center, and Percentage of Infants Diagnosed with Late-Onset Meningitis (2011-2017)

**eFigure 3.** Incidence of Lumbar Puncture Among Infants with Culture-confirmed Late-Onset Sepsis by Center (2011-2017)

This supplemental material has been provided by the authors to give readers additional information about their work.

**eTable 1. Newborn Hospitalization Morbidities and Outcomes**

| Outcomes                                                                  | n   | Infants with LOM n=167 | n    | Infants with LOS and No LOM n=4564 | n    | Infants with No LOS or LOM n=8641 | P-value <sup>a</sup> |
|---------------------------------------------------------------------------|-----|------------------------|------|------------------------------------|------|-----------------------------------|----------------------|
| Early-onset sepsis <sup>b</sup> , n (%)                                   | 167 | 3 (2)                  | 4563 | 84 (2)                             | 8640 | 219 (3)                           | 0.037                |
| Late-onset blood culture negative clinical infection <sup>c</sup> , n (%) | 167 | 91 (54)                | 4563 | 2385 (52)                          | 8634 | 4136 (48)                         | <0.001               |
| Severe intracranial hemorrhage <sup>d</sup> , n (%)                       | 166 | 51 (31)                | 4520 | 911 (20)                           | 8536 | 1517 (18)                         | <0.001               |
| Periventricular leukomalacia                                              | 166 | 18 (11)                | 4533 | 278 (6)                            | 8548 | 412 (5)                           | <0.001               |
| Bronchopulmonary dysplasia <sup>e</sup> , n (%)                           | 133 | 88 (66)                | 3599 | 2477 (69)                          | 7172 | 3917 (55)                         | <0.001               |
| Necrotizing enterocolitis, n (%)                                          | 167 | 29 (17)                | 4560 | 829 (18)                           | 8640 | 803 (9)                           | <0.001               |
| Failed hearing screen, n (%)                                              | 165 | 20 (12)                | 4520 | 491 (11)                           | 8514 | 843 (10)                          | 0.166                |
| Retinopathy of prematurity (any stage), n (%)                             | 142 | 106 (75)               | 3672 | 2981 (81)                          | 7114 | 4951 (70)                         | <0.001               |
| Intervention for retinopathy of prematurity, n (%)                        | 74  | 21 (28)                | 2094 | 550 (26)                           | 4058 | 687 (17)                          | <0.001               |
| Surgery, any, n (%)                                                       | 167 | 45 (27)                | 4564 | 1390 (30)                          | 8640 | 1468 (17)                         | <0.001               |

<sup>a</sup> P-values were calculated from chi-square tests for categorical variables and Kruskal-Wallis tests for continuous variables.

<sup>b</sup> Early-onset sepsis defined as culture-confirmed bloodstream infection occurring within the first 72 hours and accompanied by ≥5 days of antibiotics.

<sup>c</sup> Episode of late-onset infection occurring after 72 hours treated with antibiotics for ≥5 days during the newborn hospitalization.

<sup>d</sup> Severe intracranial hemorrhage was defined as Papile grade III or IV.<sup>15</sup>

<sup>e</sup> Bronchopulmonary dysplasia was defined as respiratory support at 36 weeks' postmenstrual age.

**eTable 2. Logistic Regression Model for Risk of Late-Onset Meningitis**

| Characteristics                           | Unadjusted results |         | Adjusted results <sup>a</sup> |         |
|-------------------------------------------|--------------------|---------|-------------------------------|---------|
|                                           | OR (95% CI)        | P-value | OR (95% CI)                   | P-value |
| Gestational age (weeks)                   | 0.80 (0.70-0.92)   | 0.002   | 0.86 (0.74-1.01)              | 0.059   |
| Birth year                                | 0.92 (0.89-0.96)   | <0.001  | 0.93 (0.89-0.97)              | 0.002   |
| Multiple gestation                        | 1.00 (0.70-1.43)   | 0.997   | 1.18 (0.81-1.72)              | 0.387   |
| Private medical insurance                 | 0.69 (0.49-0.97)   | 0.030   | 0.76 (0.53-1.08)              | 0.127   |
| Antenatal steroids                        | 1.18 (0.74-1.88)   | 0.499   | 1.51 (0.90-2.53)              | 0.122   |
| Male                                      | 0.89 (0.66-1.21)   | 0.460   | 0.87 (0.63-1.20)              | 0.392   |
| Small for gestational age                 | 0.78 (0.40-1.54)   | 0.476   | 0.81 (0.39-1.67)              | 0.561   |
| Severe ICH <sup>b</sup> (grade III or IV) | 1.94 (1.39-2.71)   | <0.001  | 1.81 (1.26-2.61)              | 0.001   |

<sup>a</sup> Odds ratio and p-values are from logistic regression model which included all covariates listed in table and center.

<sup>b</sup> ICH, intracranial hemorrhage.

**eTable 3. Distribution of Pathogens Identified in Cerebrospinal Fluid**

| Pathogen                                 | Infants with late-onset meningitis <sup>a</sup><br>(n=167) |      |
|------------------------------------------|------------------------------------------------------------|------|
|                                          | n                                                          | %    |
| <b>Bacterial</b>                         |                                                            |      |
| Coagulase-negative <i>Staphylococcus</i> | 98                                                         | 58.7 |
| <i>Escherichia coli</i>                  | 27                                                         | 16.2 |
| <i>Klebsiella spp.</i>                   | 15                                                         | 9.0  |
| Group B <i>Streptococcus</i>             | 15                                                         | 9.0  |
| <i>Enterococcus spp.</i>                 | 15                                                         | 9.0  |
| <i>Staphylococcus aureus</i>             | 14                                                         | 8.4  |
| <i>Streptococcus viridans</i>            | 4                                                          | 2.4  |
| <i>Serratia spp.</i>                     | 3                                                          | 1.8  |
| Other                                    | 3                                                          | 1.8  |
| <b>Fungal</b>                            |                                                            |      |
| <i>Candida albicans</i>                  | 38                                                         | 22.8 |
| <i>Candida parapsilosis</i>              | 6                                                          | 3.6  |
| Other                                    | 1                                                          | 0.6  |

<sup>a</sup> Polymicrobial late-onset meningitis was included in analyses if concurrent late-onset sepsis with the same pathogen was identified.

**eTable 4. Rate of Lumbar Puncture Performance by Late-Onset Sepsis Pathogen, 2011-2017**

| LOS Pathogen                             | LOS Cases <sup>a</sup><br>n | Lumbar Puncture Performed Ever<br>n (%) | Lumbar Puncture within 7 Days of LOS<br>n (%) |
|------------------------------------------|-----------------------------|-----------------------------------------|-----------------------------------------------|
| <b>Gram positive bacteria</b>            |                             |                                         |                                               |
| Coagulase negative <i>Staphylococcus</i> | 716                         | 332 (46)                                | 227 (32)                                      |
| <i>Staphylococcus aureus</i>             | 261                         | 135 (52)                                | 107 (41)                                      |
| <i>Enterococcus</i>                      | 61                          | 34 (56)                                 | 24 (39)                                       |
| Group B <i>Streptococcus</i>             | 60                          | 50 (83)                                 | 43 (72)                                       |
| Other Gram positive bacteria             | 28                          | 12 (43)                                 | 4 (14)                                        |
| <b>Gram negative bacteria</b>            |                             |                                         |                                               |
| <i>Escherichia coli</i>                  | 137                         | 68 (50)                                 | 55 (40)                                       |
| <i>Klebsiella</i>                        | 90                          | 56 (62)                                 | 43 (48)                                       |
| <i>Pseudomonas</i>                       | 62                          | 26 (42)                                 | 18 (29)                                       |
| <i>Enterobacter</i>                      | 37                          | 29 (78)                                 | 23 (62)                                       |
| Other Gram negative bacteria             | 40                          | 26 (65)                                 | 18 (45)                                       |
| <b>Fungus</b>                            |                             |                                         |                                               |
| <i>Candida</i>                           | 61                          | 40 (66)                                 | 23 (38)                                       |
| Other fungus                             | 2                           | 1 (50)                                  | 1 (50)                                        |
| <b>Other pathogen</b>                    |                             |                                         |                                               |
| Other bacteria Gram stain unknown        | 12                          | 7 (58)                                  | 6 (50)                                        |
| Other                                    | 17                          | 9 (53)                                  | 7 (41)                                        |

<sup>a</sup> Excludes polymicrobial LOS.

**eTable 5. Logistic Regression Models for Risk of Neurodevelopmental Impairment or Death**

| Characteristics                                               | Unadjusted results |         | Adjusted results <sup>a</sup> |         |
|---------------------------------------------------------------|--------------------|---------|-------------------------------|---------|
|                                                               | OR (95% CI)        | P-value | OR (95% CI)                   | P-value |
| <b>Model for risk of NDI<sup>b</sup> or death (composite)</b> |                    |         |                               |         |
| Gestational age (weeks)                                       | 0.61 (0.59-0.63)   | <0.001  | 0.62 (0.60-0.65)              | <0.001  |
| Birth year                                                    | 0.99 (0.98-1.00)   | 0.103   | 1.00 (0.99-1.01)              | 0.580   |
| Multiple gestation                                            | 1.05 (0.97-1.15)   | 0.232   | 1.14 (1.03-1.26)              | 0.010   |
| Private medical insurance                                     | 0.62 (0.58-0.67)   | <0.001  | 0.64 (0.58-0.70)              | <0.001  |
| Antenatal steroids                                            | 0.59 (0.53-0.66)   | <0.001  | 0.81 (0.71-0.92)              | 0.002   |
| Male                                                          | 1.45 (1.35-1.56)   | <0.001  | 1.45 (1.33-1.58)              | <0.001  |
| Small for gestational age                                     | 2.75 (2.34-3.22)   | <0.001  | 3.84 (3.22-4.58)              | <0.001  |
| Severe ICH <sup>c</sup> (grade III or IV)                     | 3.57 (3.22-3.96)   | <0.001  | 3.15 (2.80-3.54)              | <0.001  |
| Infection status                                              |                    |         |                               |         |
| LOM <sup>d</sup>                                              | 1.81 (1.29-2.53)   | 0.001   | 1.53 (1.04-2.25)              | 0.032   |
| LOS <sup>e</sup> and no LOM <sup>d</sup>                      | 1.66 (1.53-1.79)   | <0.001  | 1.41 (1.29-1.54)              | <0.001  |
| No LOS <sup>e</sup> or LOM <sup>d</sup>                       | REF                |         | REF                           |         |
| <b>Model for risk of NDI<sup>b</sup></b>                      |                    |         |                               |         |
| Gestational age (weeks)                                       | 0.72 (0.69-0.75)   | <0.001  | 0.72 (0.68-0.76)              | <0.001  |
| Birth year                                                    | 1.03 (1.01-1.04)   | <0.001  | 1.02 (1.00-1.03)              | 0.017   |
| Multiple gestation                                            | 1.03 (0.93-1.14)   | 0.525   | 1.14 (1.02-1.28)              | 0.025   |
| Private medical insurance                                     | 0.62 (0.56-0.68)   | <0.001  | 0.64 (0.57-0.71)              | <0.001  |
| Antenatal steroids                                            | 0.69 (0.61-0.79)   | <0.001  | 0.86 (0.74-1.00)              | 0.052   |
| Male                                                          | 1.45 (1.33-1.59)   | <0.001  | 1.46 (1.33-1.62)              | <0.001  |
| Small for gestational age                                     | 2.05 (1.70-2.48)   | <0.001  | 2.56 (2.08-3.15)              | <0.001  |
| Severe ICH <sup>c</sup> (grade III or IV)                     | 2.23 (1.97-2.52)   | <0.001  | 2.09 (1.82-2.40)              | <0.001  |
| Infection status                                              |                    |         |                               |         |
| LOM <sup>d</sup>                                              | 1.49 (0.98-2.24)   | 0.059   | 1.26 (0.79-2.01)              | 0.337   |
| LOS <sup>e</sup> and no LOM <sup>d</sup>                      | 1.54 (1.40-1.69)   | <0.001  | 1.34 (1.20-1.49)              | <0.001  |
| No LOS <sup>e</sup> or LOM <sup>d</sup>                       | REF                |         | REF                           |         |
| <b>Model for risk of death</b>                                |                    |         |                               |         |
| Gestational age (weeks)                                       | 0.57 (0.55-0.59)   | <0.001  | 0.58 (0.55-0.61)              | <0.001  |
| Birth year                                                    | 0.95 (0.94-0.96)   | <0.001  | 0.96 (0.95-0.97)              | <0.001  |
| Multiple gestation                                            | 1.06 (0.96-1.17)   | 0.225   | 1.10 (0.98-1.23)              | 0.096   |
| Private medical insurance                                     | 0.74 (0.68-0.81)   | <0.001  | 0.77 (0.69-0.85)              | <0.001  |

| Characteristics                           | Unadjusted results |         | Adjusted results <sup>a</sup> |         |
|-------------------------------------------|--------------------|---------|-------------------------------|---------|
|                                           | OR (95% CI)        | P-value | OR (95% CI)                   | P-value |
| Antenatal steroids                        | 0.58 (0.52-0.65)   | <0.001  | 0.83 (0.72-0.95)              | 0.008   |
| Male                                      | 1.27 (1.16-1.38)   | <0.001  | 1.23 (1.12-1.36)              | <0.001  |
| Small for gestational age                 | 2.58 (2.24-2.97)   | <0.001  | 4.04 (3.42-4.78)              | <0.001  |
| Severe ICH <sup>c</sup> (grade III or IV) | 3.92 (3.55-4.32)   | <0.001  | 3.39 (3.03-3.79)              | <0.001  |
| Infection status                          |                    |         |                               |         |
| LOM <sup>d</sup>                          | 1.85 (1.32-2.61)   | 0.001   | 1.33 (0.89-1.97)              | 0.161   |
| LOS <sup>e</sup> and no LOM <sup>d</sup>  | 1.52 (1.40-1.66)   | <0.001  | 1.23 (1.11-1.36)              | <0.001  |
| No LOS <sup>e</sup> or LOM <sup>d</sup>   | REF                |         | REF                           |         |

<sup>a</sup> Odds ratio and p-values are from logistic regression model which included all covariates listed in the table and center.

<sup>b</sup> NDI, neurodevelopmental impairment.

<sup>c</sup> ICH, intracranial hemorrhage.

<sup>d</sup> LOM, late-onset meningitis.

<sup>e</sup> LOS, late-onset sepsis.

**eTable 6. Outcomes at 18 to 26 Months' Corrected Age by Late-Onset Meningitis Pathogen Classification**

| <b>Characteristics</b>    | <b>n</b> | <b>CoNS<sup>a</sup><br/>LOM<br/>n=47</b> | <b>n</b> | <b>Non-CoNS<sup>a</sup><br/>Bacterial LOM<br/>n=70</b> | <b>n</b> | <b>Fungal<br/>LOM<br/>n=34</b> | <b>P-value<sup>b</sup></b> |
|---------------------------|----------|------------------------------------------|----------|--------------------------------------------------------|----------|--------------------------------|----------------------------|
| NDI <sup>c</sup> or Death | 46       | 22 (48)                                  | 67       | 43 (64)                                                | 33       | 26 (79)                        | 0.018                      |
| NDI <sup>c</sup>          | 36       | 12 (33)                                  | 39       | 15 (38)                                                | 20       | 13 (65)                        | 0.059                      |
| Death                     | 47       | 10 (21)                                  | 70       | 28 (40)                                                | 34       | 13 (38)                        | 0.091                      |

<sup>a</sup> CoNS, coagulase negative *Staphylococcus*.

<sup>b</sup> P-values were calculated from chi-square tests.

<sup>c</sup> NDI, neurodevelopmental impairment.



**eFigure 1. Incidence of Detected Late-Onset Meningitis by Center (2003-2017)**

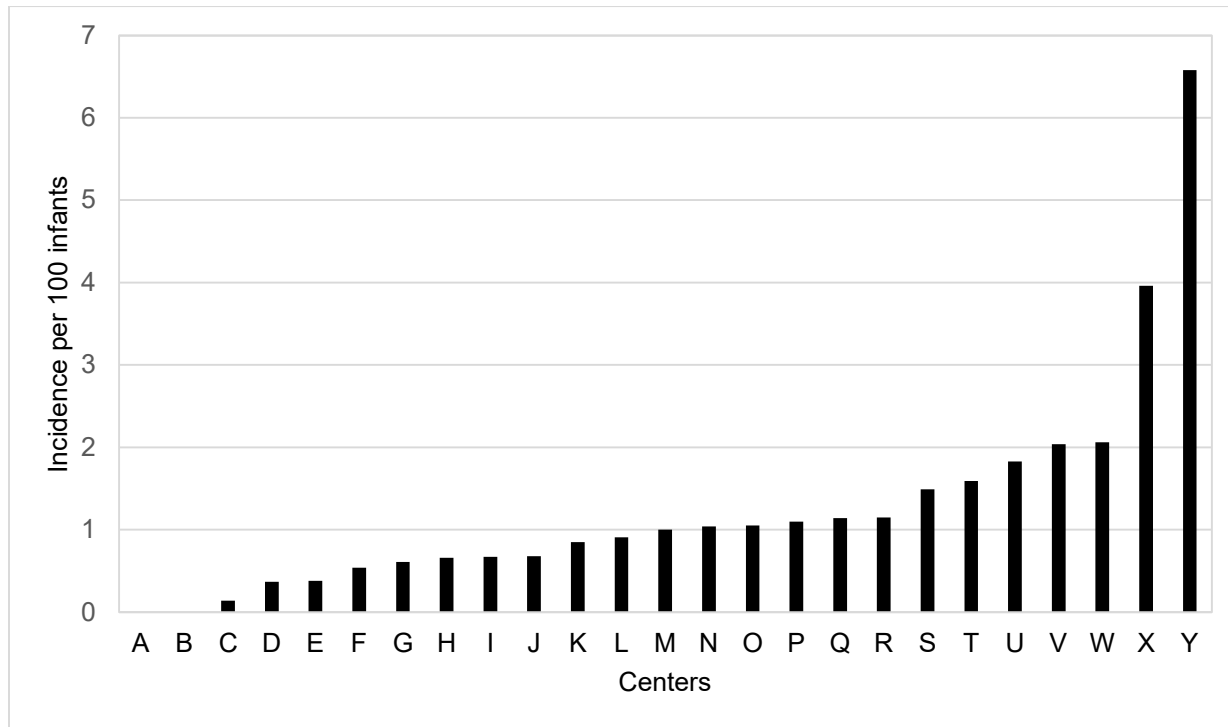

**eFigure 2. Incidence of Lumbar Puncture (LP) in Late-Onset Sepsis Evaluations by Center, and Percentage of Infants Diagnosed with Late-Onset Meningitis (2011-2017)<sup>a</sup>**

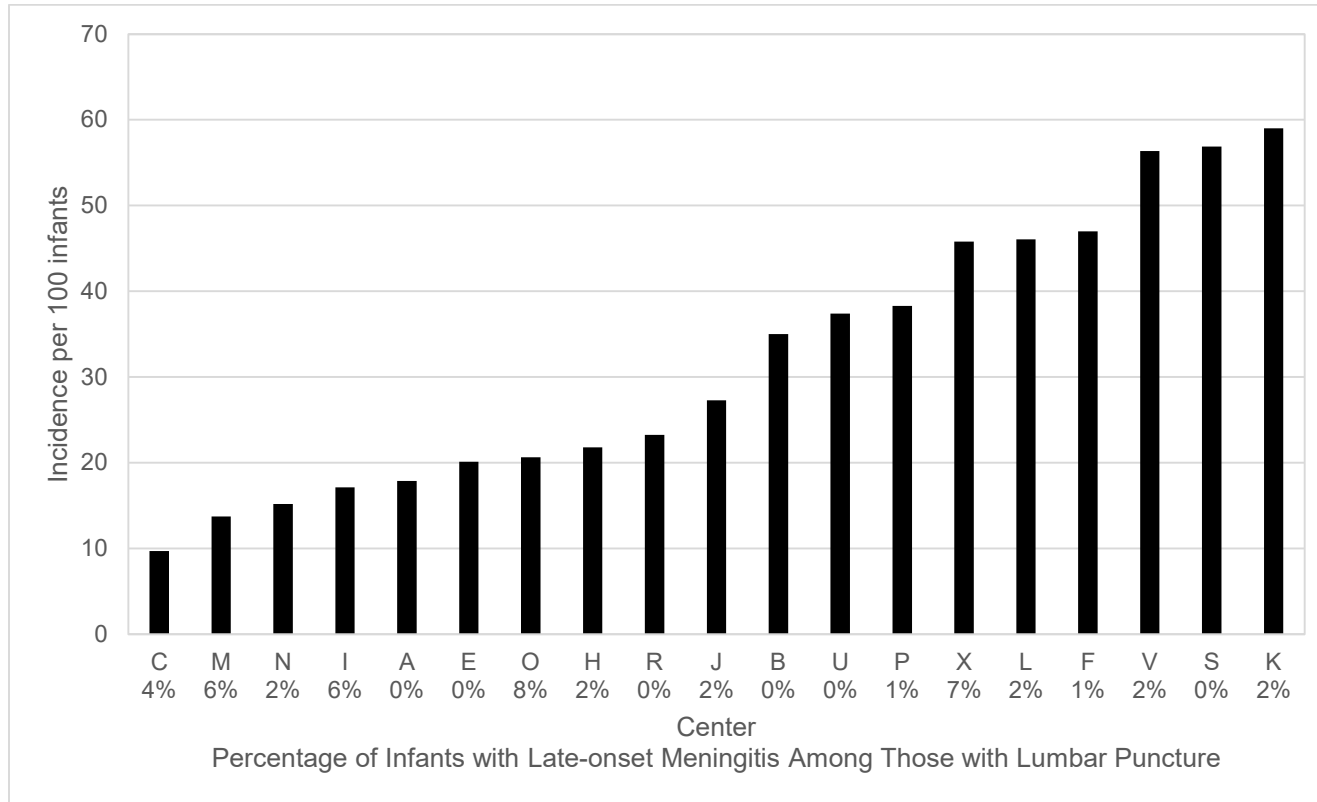

<sup>a</sup>There were six fewer centers in the NRN for the period 2011-2017 compared to the full period 2003-2017. The centers are represented by the same letter in eFigures 1-3.

**eFigure 3. Incidence of Lumbar Puncture Among Infants with Culture-confirmed Late-Onset Sepsis by Center (2011-2017)<sup>a</sup>**

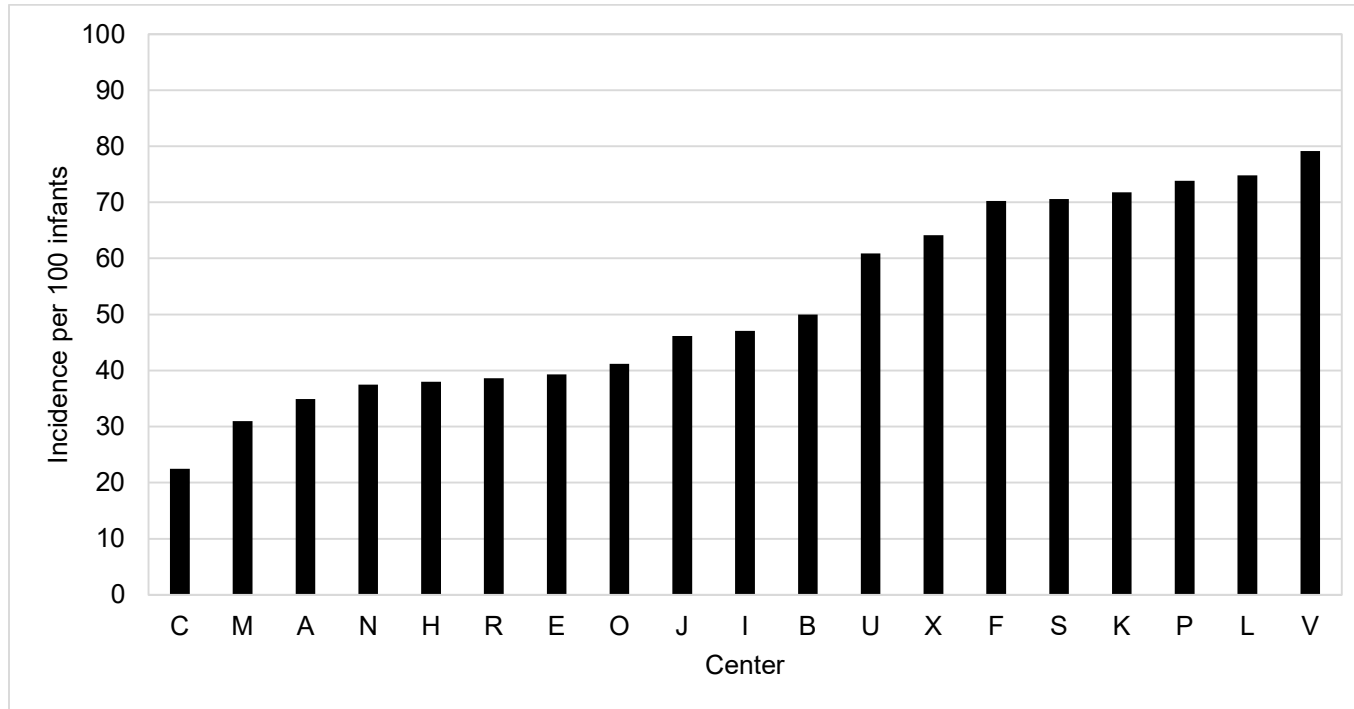

<sup>a</sup>There were six fewer centers in the NRN for the period 2011-2017 compared to the full period 2003-2017. The centers are represented by the same letter in eFigures 1-3.
