# Supplementary material for: Incidence of and Neurodevelopmental Outcomes After Late-Onset Meningitis Among Children Born Extremely Preterm
Source: PubMed Central journal article supplement (PMC9856224; doi:10.1001/jamanetworkopen.2022.45826), 2022-12-08
Supplement: jamanetwopen-e2245826-s002.pdf [file jamanetwopen-e2245826-s002.pdf]

\*First name, last name, and suffix (if applicable) are required and will appear in PubMed.

| <b>*Group Name(s): Eunice Kennedy Shriver National Institute of Child Health and Human Development Neonatal Research Network</b> |                   |                              |                  |                                                                       |                                          |                                                         |                                                                                            |  |
|----------------------------------------------------------------------------------------------------------------------------------|-------------------|------------------------------|------------------|-----------------------------------------------------------------------|------------------------------------------|---------------------------------------------------------|--------------------------------------------------------------------------------------------|--|
| <b>*First Name and Middle Initial(s)</b>                                                                                         | <b>*Last Name</b> | <b>*Suffix (eg, Jr, III)</b> | Academic Degrees | Institution                                                           | Location (city, state/province, country) | Role or Contribution, eg, chair, principal investigator | Group (if more than 1 Group listed in the byline) and/or Subgroup (eg, Steering Committee) |  |
| Namasivayam                                                                                                                      | Ambalavanan       |                              | MD               | Division of Neonatology, University of Alabama at Birmingham          | Birmingham, AL, USA                      | Co-Principal Investigator                               | NICHD Neonatal Research Network                                                            |  |
| Kirstin J.                                                                                                                       | Bailey            |                              | PhD              | Division of Neonatology, University of Alabama at Birmingham          | Birmingham, AL, USA                      | Follow-up Examiner                                      | NICHD Neonatal Research Network                                                            |  |
| Fred J.                                                                                                                          | Biasini           |                              | PhD              | Division of Neonatology, University of Alabama at Birmingham          | Birmingham, AL, USA                      | Follow-up Examiner                                      | NICHD Neonatal Research Network                                                            |  |
| Waldemar A.                                                                                                                      | Carlo             |                              | MD               | Division of Neonatology, University of Alabama at Birmingham          | Birmingham, AL, USA                      | Principal Investigator                                  | NICHD Neonatal Research Network                                                            |  |
| Stephanie A.                                                                                                                     | Chopko            |                              | PhD              | Division of Neonatology, University of Alabama at Birmingham          | Birmingham, AL, USA                      | Follow-up Examiner                                      | NICHD Neonatal Research Network                                                            |  |
| Monica V.                                                                                                                        | Collins           |                              | RN BSN MA        | Division of Neonatology, University of Alabama at Birmingham          | Birmingham, AL, USA                      | Research Coordinator                                    | NICHD Neonatal Research Network                                                            |  |
| Shirley S.                                                                                                                       | Cosby             |                              | RN BSN           | Division of Neonatology, University of Alabama at Birmingham          | Birmingham, AL, USA                      | Research Coordinator                                    | NICHD Neonatal Research Network                                                            |  |
| Kristen C.                                                                                                                       | Johnston          |                              | MSN CRNP         | Division of Neonatology, University of Alabama at Birmingham          | Birmingham, AL, USA                      | Follow-up Examiner                                      | NICHD Neonatal Research Network                                                            |  |
| Mary Beth                                                                                                                        | Moses             |                              | PT MS PCS        | Division of Neonatology, University of Alabama at Birmingham          | Birmingham, AL, USA                      | Follow-up Examiner                                      | NICHD Neonatal Research Network                                                            |  |
| Kathleen G.                                                                                                                      | Nelson            |                              | MD               | Division of Neonatology, University of Alabama at Birmingham          | Birmingham, AL, USA                      | Follow-up Examiner                                      | NICHD Neonatal Research Network                                                            |  |
| Cryshelle S.                                                                                                                     | Patterson         |                              | PhD              | Division of Neonatology, University of Alabama at Birmingham          | Birmingham, AL, USA                      | Follow-up Examiner                                      | NICHD Neonatal Research Network                                                            |  |
| Myriam                                                                                                                           | Peralta-Carcelen  |                              | MD MPH           | Division of Neonatology, University of Alabama at Birmingham          | Birmingham, AL, USA                      | Follow-up Principal Investigator                        | NICHD Neonatal Research Network                                                            |  |
| Vivien A.                                                                                                                        | Phillips          |                              | RN BSN           | Division of Neonatology, University of Alabama at Birmingham          | Birmingham, AL, USA                      | Follow-up Coordinator                                   | NICHD Neonatal Research Network                                                            |  |
| Julie                                                                                                                            | Preskitt          |                              | PhD MSOT         | Division of Neonatology, University of Alabama at Birmingham          | Birmingham, AL, USA                      | Follow-up Examiner                                      | NICHD Neonatal Research Network                                                            |  |
| Richard V.                                                                                                                       | Rector            |                              | PhD              | Division of Neonatology, University of Alabama at Birmingham          | Birmingham, AL, USA                      | Follow-up Examiner                                      | NICHD Neonatal Research Network                                                            |  |
| Sally                                                                                                                            | Whitley           |                              | MA OTR-L         | Division of Neonatology, University of Alabama at Birmingham          | Birmingham, AL, USA                      | Follow-up Examiner                                      | NICHD Neonatal Research Network                                                            |  |
| Barbara                                                                                                                          | Alksninis         |                              | RNC PNP          | Department of Pediatrics, Women & Children's Hospital of Rhode Island | Providence, RI, USA                      | Follow-up Examiner                                      | NICHD Neonatal Research Network                                                            |  |
| Carmena                                                                                                                          | Bishop            |                              |                  | Department of Pediatrics, Women & Children's Hospital of Rhode Island | Providence, RI, USA                      | Follow-up Coordinator                                   | NICHD Neonatal Research Network                                                            |  |
| Robert T.                                                                                                                        | Burke             |                              | MD MPH           | Department of Pediatrics, Women & Children's Hospital of Rhode Island | Providence, RI, USA                      |                                                         | NICHD Neonatal Research Network                                                            |  |
| Melinda                                                                                                                          | Caskey            |                              | MD               | Department of Pediatrics, Women & Children's Hospital of Rhode Island | Providence, RI, USA                      | Follow-up Examiner                                      | NICHD Neonatal Research Network                                                            |  |
| Angelita M.                                                                                                                      | Hensman           |                              | PhD RNC-N        | Department of Pediatrics, Women & Children's Hospital of Rhode Island | Providence, RI, USA                      | Research Coordinator                                    | NICHD Neonatal Research Network                                                            |  |
| Laurie                                                                                                                           | Hoffman           |                              | MD               | Department of Pediatrics, Women & Children's Hospital of Rhode Island | Providence, RI, USA                      |                                                         | NICHD Neonatal Research Network                                                            |  |
| Katharine                                                                                                                        | Johnson           |                              | MD               | Department of Pediatrics, Women & Children's Hospital of Rhode Island | Providence, RI, USA                      | Follow-up Examiner                                      | NICHD Neonatal Research Network                                                            |  |
| Martin                                                                                                                           | Keszler           |                              | MD               | Department of Pediatrics, Women & Children's Hospital of Rhode Island | Providence, RI, USA                      | Co-Principal Investigator                               | NICHD Neonatal Research Network                                                            |  |
| Mary Lenore                                                                                                                      | Keszler           |                              | MD               | Department of Pediatrics, Women & Children's Hospital of Rhode Island | Providence, RI, USA                      | Follow-up Examiner                                      | NICHD Neonatal Research Network                                                            |  |
| Andrea M.                                                                                                                        | Knoll             |                              |                  | Department of Pediatrics, Women & Children's Hospital of Rhode Island | Providence, RI, USA                      |                                                         | NICHD Neonatal Research Network                                                            |  |
| Vita                                                                                                                             | Lamberson         |                              | MD               | Department of Pediatrics, Women & Children's Hospital of Rhode Island | Providence, RI, USA                      |                                                         | NICHD Neonatal Research Network                                                            |  |
| Abbot R.                                                                                                                         | Laptook           |                              | MD               | Department of Pediatrics, Women & Children's Hospital of Rhode Island | Providence, RI, USA                      | Principal Investigator                                  | NICHD Neonatal Research Network                                                            |  |
| Theresa M.                                                                                                                       | Leach             |                              | MEd CAES         | Department of Pediatrics, Women & Children's Hospital of Rhode Island | Providence, RI, USA                      | Follow-up Examiner                                      | NICHD Neonatal Research Network                                                            |  |
| Emilee                                                                                                                           | Little            |                              | RN BSN           | Department of Pediatrics, Women & Children's Hospital of Rhode Island | Providence, RI, USA                      |                                                         | NICHD Neonatal Research Network                                                            |  |
| Elizabeth C.                                                                                                                     | McGowan           |                              | MD               | Department of Pediatrics, Women & Children's Hospital of Rhode Island | Providence, RI, USA                      | Follow-up Examiner                                      | NICHD Neonatal Research Network                                                            |  |

## Supplemental Online Content: Nonauthor Collaborators

\*First name, last name, and suffix (if applicable) are required and will appear in PubMed.

| *First Name and Middle Initial(s) | *Last Name      | *Suffix (eg, Jr, III) | Academic Degrees | Institution                           | Location (city, state/province, country) | Role or Contribution, eg, chair, principal investigator | Group (if more than 1 Group listed in the byline) and/or Subgroup (eg, Steering Committee) |
|-----------------------------------|-----------------|-----------------------|------------------|---------------------------------------|------------------------------------------|---------------------------------------------------------|--------------------------------------------------------------------------------------------|
| William                           | Oh              |                       | MD               | Department of Pediatrics, Women &     | Providence, RI, USA                      | Steering Committee Chair                                | NICHD Neonatal Research Network                                                            |
| Lucille                           | St. Pierre      |                       | BS               | Department of Pediatrics, Women &     | Providence, RI, USA                      | Research Assistant                                      | NICHD Neonatal Research Network                                                            |
| Bonnie E.                         | Stephens        |                       | MD               | Department of Pediatrics, Women &     | Providence, RI, USA                      | Follow-up Coordinator                                   | NICHD Neonatal Research Network                                                            |
| Suzy                              | Ventura         |                       |                  | Department of Pediatrics, Women &     | Providence, RI, USA                      |                                                         | NICHD Neonatal Research Network                                                            |
| Elisa                             | Vieira          |                       | RN BSN           | Department of Pediatrics, Women &     | Providence, RI, USA                      | Research Nurse                                          | NICHD Neonatal Research Network                                                            |
| Betty R.                          | Vohr            |                       | MD               | Department of Pediatrics, Women &     | Providence, RI, USA                      | Follow-up Principal Investigator                        | NICHD Neonatal Research Network                                                            |
| Victoria E.                       | Watson          |                       | MS CAS           | Department of Pediatrics, Women &     | Providence, RI, USA                      | Follow-up Examiner                                      | NICHD Neonatal Research Network                                                            |
| Kelly R.                          | Coleman         |                       | PsyD             | Department of Pediatrics, University  | Buffalo, NY, USA                         | Follow-up Examiner                                      | NICHD Neonatal Research Network                                                            |
| Stephanie                         | Guilford        |                       | BS               | Department of Pediatrics, University  | Buffalo, NY, USA                         | Research Coordinator                                    | NICHD Neonatal Research Network                                                            |
| Michelle E.                       | Hartley-McAndre |                       | MD               | Department of Pediatrics, University  | Buffalo, NY, USA                         | Follow-up Principal Investigator                        | NICHD Neonatal Research Network                                                            |
| Satyan                            | Lakshminrusimha |                       | MD               | Department of Pediatrics, University  | Buffalo, NY, USA                         | Co-Principal Investigator                               | NICHD Neonatal Research Network                                                            |
| Emily                             | Li              |                       | BA               | Department of Pediatrics, University  | Buffalo, NY, USA                         | Research Nurse                                          | NICHD Neonatal Research Network                                                            |
| Anne Marie                        | Reynolds        |                       | MD MPH           | Department of Pediatrics, University  | Buffalo, NY, USA                         | Site Investigator                                       | NICHD Neonatal Research Network                                                            |
| Michael G.                        | Sacilowski      |                       | MAT CCRC         | Department of Pediatrics, University  | Buffalo, NY, USA                         | Follow-up Coordinator                                   | NICHD Neonatal Research Network                                                            |
| Ashley                            | Williams        |                       | MS Ed            | Department of Pediatrics, University  | Buffalo, NY, USA                         | Research Coordinator                                    | NICHD Neonatal Research Network                                                            |
| William A.                        | Zorn            |                       | PhD              | Department of Pediatrics, University  | Buffalo, NY, USA                         |                                                         | NICHD Neonatal Research Network                                                            |
| Monika                            | Bhola           |                       | MD               | Department of Pediatrics, Rainbow B   | Cleveland, OH, USA                       | Follow-up Examiner                                      | NICHD Neonatal Research Network                                                            |
| Avroy A.                          | Fanaroff        |                       | MD               | Department of Pediatrics, Rainbow B   | Cleveland, OH, USA                       | Principal Investigator                                  | NICHD Neonatal Research Network                                                            |
| Harriet G.                        | Friedman        |                       | MA               | Department of Pediatrics, Rainbow B   | Cleveland, OH, USA                       | Follow-up Examiner                                      | NICHD Neonatal Research Network                                                            |
| Anna Maria                        | Hibbs           |                       | MD MSCE          | Department of Pediatrics, Rainbow B   | Cleveland, OH, USA                       | Principal Investigator                                  | NICHD Neonatal Research Network                                                            |
| Nancy S.                          | Newman          |                       | RN               | Department of Pediatrics, Rainbow B   | Cleveland, OH, USA                       | Research Coordinator                                    | NICHD Neonatal Research Network                                                            |
| Allison H.                        | Payne           |                       | MD MSCR          | Department of Pediatrics, Rainbow B   | Cleveland, OH, USA                       | Follow-up Examiner                                      | NICHD Neonatal Research Network                                                            |
| Bonnie S.                         | Siner           |                       | RN               | Department of Pediatrics, Rainbow B   | Cleveland, OH, USA                       | Follow-up Coordinator                                   | NICHD Neonatal Research Network                                                            |
| Michele C.                        | Walsh           |                       | MD MS            | Department of Pediatrics, Rainbow B   | Cleveland, OH, USA                       | Co-Principal Investigator                               | NICHD Neonatal Research Network                                                            |
| Deanne E.                         | Wilson-Costello |                       | MD               | Department of Pediatrics, Rainbow B   | Cleveland, OH, USA                       | Follow-up Principal Investigator                        | NICHD Neonatal Research Network                                                            |
| Gulgun                            | Yalcinkaya      |                       | MD               | Department of Pediatrics, Rainbow B   | Cleveland, OH, USA                       | Follow-up Examiner                                      | NICHD Neonatal Research Network                                                            |
| Michael S.                        | Caplan          |                       | MD               | Pritzker School of Medicine, Universi | Chicago, IL, USA                         | Steering Committee Chair                                | NICHD Neonatal Research Network                                                            |
| Barbara                           | Alexander       |                       | RN               | Cincinnati Children's Hospital Medica | Cincinnati, OH, USA                      | Research Coordinator                                    | NICHD Neonatal Research Network                                                            |
| Traci                             | Beiersdorfer    |                       | RN BSN           | Cincinnati Children's Hospital Medica | Cincinnati, OH, USA                      | Research Nurse                                          | NICHD Neonatal Research Network                                                            |
| Kate                              | Bridges         |                       | MD               | Cincinnati Children's Hospital Medica | Cincinnati, OH, USA                      |                                                         | NICHD Neonatal Research Network                                                            |
| Tanya E.                          | Cahill          |                       | MD               | Cincinnati Children's Hospital Medica | Cincinnati, OH, USA                      | Follow-up Examiner                                      | NICHD Neonatal Research Network                                                            |
| Edward F.                         | Donovan         |                       | MD               | Cincinnati Children's Hospital Medica | Cincinnati, OH, USA                      | Principal Investigator                                  | NICHD Neonatal Research Network                                                            |
| Juanita                           | Dudley          |                       | RN BSN           | Cincinnati Children's Hospital Medica | Cincinnati, OH, USA                      |                                                         | NICHD Neonatal Research Network                                                            |

Supplemental Online Content: Nonauthor Collaborators

\*First name, last name, and suffix (if applicable) are required and will appear in PubMed.

| *First Name and Middle Initial(s) | *Last Name     | *Suffix (eg, Jr, III) | Academic Degrees | Institution                                                 | Location (city, state/province, country) | Role or Contribution, eg, chair, principal investigator | Group (if more than 1 Group listed in the byline) and/or Subgroup (eg, Steering Committee) |
|-----------------------------------|----------------|-----------------------|------------------|-------------------------------------------------------------|------------------------------------------|---------------------------------------------------------|--------------------------------------------------------------------------------------------|
| Estelle E.                        | Fischer        |                       | MHSA MBA         | Cincinnati Children's Hospital Medical Center               | Cincinnati, OH, USA                      |                                                         | NICHD Neonatal Research Network                                                            |
| Teresa L.                         | Gratton        |                       | PA               | Cincinnati Children's Hospital Medical Center               | Cincinnati, OH, USA                      | Follow-up Coordinator                                   | NICHD Neonatal Research Network                                                            |
| Cathy                             | Grisby         |                       | BSN CCRC         | Cincinnati Children's Hospital Medical Center               | Cincinnati, OH, USA                      | Research Coordinator                                    | NICHD Neonatal Research Network                                                            |
| Devan                             | Hayes          |                       | BS               | Cincinnati Children's Hospital Medical Center               | Cincinnati, OH, USA                      |                                                         | NICHD Neonatal Research Network                                                            |
| Jody                              | Hessling       |                       | MSN RN           | Cincinnati Children's Hospital Medical Center               | Cincinnati, OH, USA                      | Research Coordinator                                    | NICHD Neonatal Research Network                                                            |
| Lenora Denise                     | Jackson        |                       | CRC              | Cincinnati Children's Hospital Medical Center               | Cincinnati, OH, USA                      |                                                         | NICHD Neonatal Research Network                                                            |
| Alan H.                           | Jobe           |                       | MD PhD           | University of Cincinnati                                    | Cincinnati, OH, USA                      | Steering Committee Chair                                | NICHD Neonatal Research Network                                                            |
| Suhas G.                          | Kallapur       |                       | MD               | Cincinnati Children's Hospital Medical Center               | Cincinnati, OH, USA                      | Co-Principal Investigator                               | NICHD Neonatal Research Network                                                            |
| Kristin                           | Kirker         |                       | CRC              | Cincinnati Children's Hospital Medical Center               | Cincinnati, OH, USA                      | Research Nurse                                          | NICHD Neonatal Research Network                                                            |
| Stephanie L.                      | Merhar         |                       | MD MS            | Cincinnati Children's Hospital Medical Center               | Cincinnati, OH, USA                      | Follow-up Principal Investigator                        | NICHD Neonatal Research Network                                                            |
| Holly L.                          | Mincey         |                       | MS RN BSN        | Cincinnati Children's Hospital Medical Center               | Cincinnati, OH, USA                      | Research Coordinator                                    | NICHD Neonatal Research Network                                                            |
| Greg                              | Muthig         |                       | BA               | Cincinnati Children's Hospital Medical Center               | Cincinnati, OH, USA                      | Research Nurse                                          | NICHD Neonatal Research Network                                                            |
| Brenda B.                         | Poindexter     |                       | MD MS            | Cincinnati Children's Hospital Medical Center               | Cincinnati, OH, USA                      | Co-Principal Investigator                               | NICHD Neonatal Research Network                                                            |
| Kurt                              | Schibler       |                       | MD               | Cincinnati Children's Hospital Medical Center               | Cincinnati, OH, USA                      | Principal Investigator                                  | NICHD Neonatal Research Network                                                            |
| Sara                              | Stacey         |                       | BA               | Cincinnati Children's Hospital Medical Center               | Cincinnati, OH, USA                      |                                                         | NICHD Neonatal Research Network                                                            |
| Jean J.                           | Steichen       |                       | MD               | Cincinnati Children's Hospital Medical Center               | Cincinnati, OH, USA                      | Follow-up Medical Director                              | NICHD Neonatal Research Network                                                            |
| Stacey                            | Tepe           |                       | BS               | Cincinnati Children's Hospital Medical Center               | Cincinnati, OH, USA                      |                                                         | NICHD Neonatal Research Network                                                            |
| Julia                             | Thompson       |                       | RN BSN           | Cincinnati Children's Hospital Medical Center               | Cincinnati, OH, USA                      | Research Nurse                                          | NICHD Neonatal Research Network                                                            |
| Marcia                            | Worley Mersmar |                       | BS RN CCRP       | Cincinnati Children's Hospital Medical Center               | Cincinnati, OH, USA                      | Research Coordinator                                    | NICHD Neonatal Research Network                                                            |
| Sandra                            | Wuertz         |                       | RN BSN CCRC      | Cincinnati Children's Hospital Medical Center               | Cincinnati, OH, USA                      | Research Nurse                                          | NICHD Neonatal Research Network                                                            |
| Kimberly                          | Yolton         |                       | PhD              | Cincinnati Children's Hospital Medical Center               | Cincinnati, OH, USA                      | Follow-up Principal Investigator                        | NICHD Neonatal Research Network                                                            |
| Richard A.                        | Polin          |                       | MD               | Division of Neonatology, College of Physicians and Surgeons | New York, NY, USA                        | Steering Committee Chair                                | NICHD Neonatal Research Network                                                            |
| Sally S.                          | Adams          |                       | MS RN CPNP       | Department of Pediatrics, University of Texas at Dallas     | Dallas, TX, USA                          | Follow-up Examiner                                      | NICHD Neonatal Research Network                                                            |
| Luc P.                            | Brion          |                       | MD               | Department of Pediatrics, University of Texas at Dallas     | Dallas, TX, USA                          | Co-Principal Investigator                               | NICHD Neonatal Research Network                                                            |
| Lijun                             | Chen           |                       | PhD RN           | Department of Pediatrics, University of Texas at Dallas     | Dallas, TX, USA                          | Research Coordinator                                    | NICHD Neonatal Research Network                                                            |
| Maria M.                          | De Leon        |                       | RN BSN           | Department of Pediatrics, University of Texas at Dallas     | Dallas, TX, USA                          | Research Nurse                                          | NICHD Neonatal Research Network                                                            |
| Frances                           | Eubanks        |                       | RN BSN           | Department of Pediatrics, University of Texas at Dallas     | Dallas, TX, USA                          | Research Nurse                                          | NICHD Neonatal Research Network                                                            |
| Alicia                            | Guzman         |                       |                  | Department of Pediatrics, University of Texas at Dallas     | Dallas, TX, USA                          | Research Coordinator                                    | NICHD Neonatal Research Network                                                            |
| Gaynelle                          | Hensley        |                       | RN               | Department of Pediatrics, University of Texas at Dallas     | Dallas, TX, USA                          | Research Coordinator                                    | NICHD Neonatal Research Network                                                            |
| Elizabeth T.                      | Heyne          |                       | MS MA PA-C       | Department of Pediatrics, University of Texas at Dallas     | Dallas, TX, USA                          | Follow-up Examiner                                      | NICHD Neonatal Research Network                                                            |
| Roy J.                            | Heyne          |                       | MD               | Department of Pediatrics, University of Texas at Dallas     | Dallas, TX, USA                          | Follow-up Principal Investigator                        | NICHD Neonatal Research Network                                                            |
| Jackie F.                         | Hickman        |                       | RN               | Department of Pediatrics, University of Texas at Dallas     | Dallas, TX, USA                          | Follow-up Coordinator                                   | NICHD Neonatal Research Network                                                            |
| Lizette E.                        | Lee            |                       | RN               | Department of Pediatrics, University of Texas at Dallas     | Dallas, TX, USA                          | Research Nurse                                          | NICHD Neonatal Research Network                                                            |

## Supplemental Online Content: Nonauthor Collaborators

\*First name, last name, and suffix (if applicable) are required and will appear in PubMed.

| *First Name and Middle Initial(s) | *Last Name       | *Suffix (eg, Jr, III) | Academic Degrees | Institution                          | Location (city, state/province, country) | Role or Contribution, eg, chair, principal investigator | Group (if more than 1 Group listed in the byline) and/or Subgroup (eg, Steering Committee) |
|-----------------------------------|------------------|-----------------------|------------------|--------------------------------------|------------------------------------------|---------------------------------------------------------|--------------------------------------------------------------------------------------------|
| Melissa H.                        | Leps             |                       | RN               | Department of Pediatrics, University | Dallas, TX, USA                          | Research Coordinator                                    | NICHD Neonatal Research Network                                                            |
| Linda A.                          | Madden           |                       | RN BSN CP        | Department of Pediatrics, University | Dallas, TX, USA                          | Follow-up Examiner                                      | NICHD Neonatal Research Network                                                            |
| E. Rebecca                        | McDougald        |                       | MSN APRN         | Department of Pediatrics, University | Dallas, TX, USA                          |                                                         | NICHD Neonatal Research Network                                                            |
| Nancy A.                          | Miller           |                       | RN               | Department of Pediatrics, University | Dallas, TX, USA                          | Research Coordinator                                    | NICHD Neonatal Research Network                                                            |
| Janet S.                          | Morgan           |                       | RN               | Department of Pediatrics, University | Dallas, TX, USA                          | Follow-up Coordinator                                   | NICHD Neonatal Research Network                                                            |
| Lara                              | Pavageau         |                       | MD               | Department of Pediatrics, University | Dallas, TX, USA                          | Site Investigator                                       | NICHD Neonatal Research Network                                                            |
| Charles R.                        | Rosenfeld        |                       | MD               | Department of Pediatrics, University | Dallas, TX, USA                          | Principal Investigator                                  | NICHD Neonatal Research Network                                                            |
| Walid A.                          | Salhab           |                       | MD               | Department of Pediatrics, University | Dallas, TX, USA                          | Co-Principal Investigator                               | NICHD Neonatal Research Network                                                            |
| Pablo J.                          | Sánchez          |                       | MD               | Department of Pediatrics, University | Dallas, TX, USA                          |                                                         | NICHD Neonatal Research Network                                                            |
| Pollianna                         | Sepulveda        |                       | RN BSN           | Department of Pediatrics, University | Dallas, TX, USA                          | Research Nurse                                          | NICHD Neonatal Research Network                                                            |
| Catherine                         | Twell Boatman    |                       | MS CIMI          | Department of Pediatrics, University | Dallas, TX, USA                          | Follow-up Examiner                                      | NICHD Neonatal Research Network                                                            |
| Diana M.                          | Vasil            |                       | MSN RNC-IB       | Department of Pediatrics, University | Dallas, TX, USA                          | Research Coordinator                                    | NICHD Neonatal Research Network                                                            |
| Jillian                           | Waterbury        |                       | DNP RN CP        | Department of Pediatrics, University | Dallas, TX, USA                          |                                                         | NICHD Neonatal Research Network                                                            |
| Myra H.                           | Wyckoff          |                       | MD               | Department of Pediatrics, University | Dallas, TX, USA                          | Principal Investigator                                  | NICHD Neonatal Research Network                                                            |
| Patricia L.                       | Ashley           |                       | MD PhD           | Department of Pediatrics, Duke Univ  | Durham, NC, USA                          | Follow-up Examiner                                      | NICHD Neonatal Research Network                                                            |
| Kathy J.                          | Auten            |                       | MSHS             | Department of Pediatrics, Duke Univ  | Durham, NC, USA                          | Research Coordinator                                    | NICHD Neonatal Research Network                                                            |
| C. Michael                        | Cotten           |                       | MD MHS           | Department of Pediatrics, Duke Univ  | Durham, NC, USA                          | Co-Principal Investigator                               | NICHD Neonatal Research Network                                                            |
| Joanne                            | Finkle           |                       | RN JD            | Department of Pediatrics, Duke Univ  | Durham, NC, USA                          | Research Coordinator                                    | NICHD Neonatal Research Network                                                            |
| Kimberley A.                      | Fisher           |                       | PhD FNP-BC       | Department of Pediatrics, Duke Univ  | Durham, NC, USA                          | Research Coordinator                                    | NICHD Neonatal Research Network                                                            |
| Ronald N.                         | Goldberg         |                       | MD               | Department of Pediatrics, Duke Univ  | Durham, NC, USA                          | Co-Principal Investigator                               | NICHD Neonatal Research Network                                                            |
| Ricki F.                          | Goldstein        |                       | MD               | Department of Pediatrics, Duke Univ  | Durham, NC, USA                          | Follow-up Principal Investigator                        | NICHD Neonatal Research Network                                                            |
| Sandra                            | Grimes           |                       | RN BSN           | Department of Pediatrics, Duke Univ  | Durham, NC, USA                          | Follow-up Coordinator                                   | NICHD Neonatal Research Network                                                            |
| Kathryn E.                        | Gustafson        |                       | PhD              | Department of Pediatrics, Duke Univ  | Durham, NC, USA                          | Follow-up Examiner                                      | NICHD Neonatal Research Network                                                            |
| Melody B.                         | Lohmeyer         |                       | RN MSN           | Department of Pediatrics, Duke Univ  | Durham, NC, USA                          | Follow-up Coordinator                                   | NICHD Neonatal Research Network                                                            |
| William F.                        | Malcolm          |                       | MD               | Department of Pediatrics, Duke Univ  | Durham, NC, USA                          | Follow-up Examiner                                      | NICHD Neonatal Research Network                                                            |
| Ira                               | Adams-Chapman    |                       | MD MPH           | Department of Pediatrics, Emory Univ | Atlanta, GA, USA                         | Follow-up Principal Investigator                        | NICHD Neonatal Research Network                                                            |
| Ann                               | Blackwelder      |                       | MN RN            | Department of Pediatrics, Emory Univ | Atlanta, GA, USA                         | Site Investigator                                       | NICHD Neonatal Research Network                                                            |
| Diane I.                          | Bottcher         |                       | RN MSN           | Department of Pediatrics, Emory Univ | Atlanta, GA, USA                         | Research Nurse                                          | NICHD Neonatal Research Network                                                            |
| David P.                          | Carlton          |                       | MD               | Department of Pediatrics, Emory Univ | Atlanta, GA, USA                         | Principal Investigator                                  | NICHD Neonatal Research Network                                                            |
| Sheena L.                         | Carter           |                       | PhD              | Department of Pediatrics, Emory Univ | Atlanta, GA, USA                         | Follow-up Examiner                                      | NICHD Neonatal Research Network                                                            |
| Ellen C.                          | Hale             |                       | RN BS CCRP       | Department of Pediatrics, Emory Univ | Atlanta, GA, USA                         | Research Coordinator                                    | NICHD Neonatal Research Network                                                            |
| Salathiel                         | Kendrick-Allwood |                       | MD               | Department of Pediatrics, Emory Univ | Atlanta, GA, USA                         |                                                         | NICHD Neonatal Research Network                                                            |
| Judith                            | Laursen          |                       | RN               | Department of Pediatrics, Emory Univ | Atlanta, GA, USA                         |                                                         | NICHD Neonatal Research Network                                                            |

## Supplemental Online Content: Nonauthor Collaborators

\*First name, last name, and suffix (if applicable) are required and will appear in PubMed.

| *First Name and Middle Initial(s) | *Last Name       | *Suffix (eg, Jr, III) | Academic Degrees | Institution                         | Location (city, state/province, country) | Role or Contribution, eg, chair, principal investigator | Group (if more than 1 Group listed in the byline) and/or Subgroup (eg, Steering Committee) |
|-----------------------------------|------------------|-----------------------|------------------|-------------------------------------|------------------------------------------|---------------------------------------------------------|--------------------------------------------------------------------------------------------|
| Yvonne C.                         | Loggins          |                       | RN BSN           | Department of Pediatrics, Emory Uni | Atlanta, GA, USA                         | Research Coordinator                                    | NICHD Neonatal Research Network                                                            |
| Colleen                           | Mackie           |                       | BS RT            | Department of Pediatrics, Emory Uni | Atlanta, GA, USA                         | Research Nurse                                          | NICHD Neonatal Research Network                                                            |
| Maureen                           | Mulligan LaRossa |                       | RN               | Department of Pediatrics, Emory Uni | Atlanta, GA, USA                         | Follow-up Examiner                                      | NICHD Neonatal Research Network                                                            |
| Ravi M.                           | Patel            |                       | MD MSc           | Department of Pediatrics, Emory Uni | Atlanta, GA, USA                         | Co-Principal Investigator                               | NICHD Neonatal Research Network                                                            |
| Amy                               | Sanders          |                       | PsyD             | Department of Pediatrics, Emory Uni | Atlanta, GA, USA                         |                                                         | NICHD Neonatal Research Network                                                            |
| Irma                              | Seabrook         |                       | RRT              | Department of Pediatrics, Emory Uni | Atlanta, GA, USA                         |                                                         | NICHD Neonatal Research Network                                                            |
| Gloria V.                         | Smikle           |                       | PNP MSN          | Department of Pediatrics, Emory Uni | Atlanta, GA, USA                         | Follow-up Examiner                                      | NICHD Neonatal Research Network                                                            |
| Lynn                              | Wineski          |                       | NNP              | Department of Pediatrics, Emory Uni | Atlanta, GA, USA                         | Follow-up Examiner                                      | NICHD Neonatal Research Network                                                            |
| Esther G.                         | Akpa             |                       | RN BSN           | Department of Pediatrics, McGovern  | Houston, TX, USA                         | Research Coordinator                                    | NICHD Neonatal Research Network                                                            |
| Nora I.                           | Alaniz           |                       | BS               | Department of Pediatrics, McGovern  | Houston, TX, USA                         |                                                         | NICHD Neonatal Research Network                                                            |
| Elizabeth                         | Allain           |                       | PhD              | Department of Pediatrics, McGovern  | Houston, TX, USA                         | Follow-up Examiner                                      | NICHD Neonatal Research Network                                                            |
| Julie                             | Arltd-McAlister  |                       | MSN APRN         | Department of Pediatrics, McGovern  | Houston, TX, USA                         | Research Nurse                                          | NICHD Neonatal Research Network                                                            |
| Pamela J.                         | Bradt            |                       | MD MPH           | Department of Pediatrics, McGovern  | Houston, TX, USA                         | Follow-up Principal Inv                                 | NICHD Neonatal Research Network                                                            |
| Katrina                           | Burson           |                       | RN BSN           | Department of Pediatrics, McGovern  | Houston, TX, USA                         | Research Nurse                                          | NICHD Neonatal Research Network                                                            |
| Allison G.                        | Dempsey          |                       | PhD              | Department of Pediatrics, McGovern  | Houston, TX, USA                         | Follow-up Examiner                                      | NICHD Neonatal Research Network                                                            |
| Susan E.                          | Dieterich        |                       | PhD              | Department of Pediatrics, McGovern  | Houston, TX, USA                         | Follow-up Examiner                                      | NICHD Neonatal Research Network                                                            |
| Andrea F.                         | Duncan           |                       | MD MSCLin        | Department of Pediatrics, McGovern  | Houston, TX, USA                         | Follow-up Principal Inv                                 | NICHD Neonatal Research Network                                                            |
| Elizabeth                         | Eason            |                       | MD               | Department of Pediatrics, McGovern  | Houston, TX, USA                         | Site Investigator                                       | NICHD Neonatal Research Network                                                            |
| Patricia W.                       | Evans            |                       | MD               | Department of Pediatrics, McGovern  | Houston, TX, USA                         | Follow-up Principal Inv                                 | NICHD Neonatal Research Network                                                            |
| Beverly                           | Foley Harris     |                       | RN BSN           | Department of Pediatrics, McGovern  | Houston, TX, USA                         | Research Nurse                                          | NICHD Neonatal Research Network                                                            |
| Claudia I.                        | Franco           |                       | RNC MSN          | Department of Pediatrics, McGovern  | Houston, TX, USA                         | Research Coordinator                                    | NICHD Neonatal Research Network                                                            |
| Carmen                            | Garcia           |                       | RN BSN           | Department of Pediatrics, McGovern  | Houston, TX, USA                         | Research Nurse                                          | NICHD Neonatal Research Network                                                            |
| Charles E.                        | Green            |                       | PhD              | Department of Pediatrics, McGovern  | Houston, TX, USA                         | Follow-up Examiner                                      | NICHD Neonatal Research Network                                                            |
| Donna J.                          | Hall             |                       | RN               | Department of Pediatrics, McGovern  | Houston, TX, USA                         |                                                         | NICHD Neonatal Research Network                                                            |
| Margarita                         | Jimenez          |                       | MD MPH           | Department of Pediatrics, McGovern  | Houston, TX, USA                         | Follow-up Examiner                                      | NICHD Neonatal Research Network                                                            |
| Janice                            | John             |                       | CPNP             | Department of Pediatrics, McGovern  | Houston, TX, USA                         |                                                         | NICHD Neonatal Research Network                                                            |
| Patrick M.                        | Jones            |                       | MD MA            | Department of Pediatrics, McGovern  | Houston, TX, USA                         |                                                         | NICHD Neonatal Research Network                                                            |
| Kathleen A.                       | Kennedy          |                       | MD MPH           | Department of Pediatrics, McGovern  | Houston, TX, USA                         | Principal Investigator                                  | NICHD Neonatal Research Network                                                            |
| Amir M.                           | Khan             |                       | MD               | Department of Pediatrics, McGovern  | Houston, TX, USA                         | Site Investigator                                       | NICHD Neonatal Research Network                                                            |
| Saba                              | Khan Siddiki     |                       | MD               | Department of Pediatrics, McGovern  | Houston, TX, USA                         |                                                         | NICHD Neonatal Research Network                                                            |
| Layne                             | Lillie           |                       | RN BSN           | Department of Pediatrics, McGovern  | Houston, TX, USA                         |                                                         | NICHD Neonatal Research Network                                                            |
| Anna E.                           | Lis              |                       | RN BSN           | Department of Pediatrics, McGovern  | Houston, TX, USA                         |                                                         | NICHD Neonatal Research Network                                                            |
| Terri L.                          | Major-Kincade    |                       | MD MPH           | Department of Pediatrics, McGovern  | Houston, TX, USA                         | Follow-up Examiner                                      | NICHD Neonatal Research Network                                                            |

## Supplemental Online Content: Nonauthor Collaborators

\*First name, last name, and suffix (if applicable) are required and will appear in PubMed.

| *First Name and Middle Initial(s) | *Last Name  | *Suffix (eg, Jr, III) | Academic Degrees | Institution                          | Location (city, state/province, country) | Role or Contribution, eg, chair, principal investigator | Group (if more than 1 Group listed in the byline) and/or Subgroup (eg, Steering Committee) |
|-----------------------------------|-------------|-----------------------|------------------|--------------------------------------|------------------------------------------|---------------------------------------------------------|--------------------------------------------------------------------------------------------|
| Karen                             | Martin      |                       | RN               | Department of Pediatrics, McGovern   | Houston, TX, USA                         | Research Nurse                                          | NICHD Neonatal Research Network                                                            |
| Sara C.                           | Martin      |                       | RN BSN           | Department of Pediatrics, McGovern   | Houston, TX, USA                         | Research Nurse                                          | NICHD Neonatal Research Network                                                            |
| Georgia Elaine                    | McDavid     |                       | RN               | Department of Pediatrics, McGovern   | Houston, TX, USA                         | Research Coordinator                                    | NICHD Neonatal Research Network                                                            |
| Shannon L.                        | McKee       |                       | EdS              | Department of Pediatrics, McGovern   | Houston, TX, USA                         |                                                         | NICHD Neonatal Research Network                                                            |
| Brenda H.                         | Morris      |                       | MD               | Department of Pediatrics, McGovern   | Houston, TX, USA                         | Study Investigator                                      | NICHD Neonatal Research Network                                                            |
| Patricia Ann                      | Orekoya     |                       | RN BSN           | Department of Pediatrics, McGovern   | Houston, TX, USA                         | Research Coordinator                                    | NICHD Neonatal Research Network                                                            |
| Claudia                           | Pedrozza    |                       | PhD              | Department of Pediatrics, McGovern   | Houston, TX, USA                         |                                                         | NICHD Neonatal Research Network                                                            |
| Carrie M.                         | Perez       |                       | MA               | Department of Pediatrics, McGovern   | Houston, TX, USA                         |                                                         | NICHD Neonatal Research Network                                                            |
| Patti L.                          | Pierce Tate |                       | RCP              | Department of Pediatrics, McGovern   | Houston, TX, USA                         | Research Nurse                                          | NICHD Neonatal Research Network                                                            |
| Stacey                            | Reddoch     |                       | BA               | Department of Pediatrics, McGovern   | Houston, TX, USA                         |                                                         | NICHD Neonatal Research Network                                                            |
| Shawna                            | Rodgers     |                       | RN BSN           | Department of Pediatrics, McGovern   | Houston, TX, USA                         |                                                         | NICHD Neonatal Research Network                                                            |
| Maegan C.                         | Simmons     |                       | RN               | Department of Pediatrics, McGovern   | Houston, TX, USA                         | Research Nurse                                          | NICHD Neonatal Research Network                                                            |
| Daniel K.                         | Sperry      |                       | RN               | Department of Pediatrics, McGovern   | Houston, TX, USA                         | Research Nurse                                          | NICHD Neonatal Research Network                                                            |
| Emily K.                          | Stephens    |                       | BSN RNC-N        | Department of Pediatrics, McGovern   | Houston, TX, USA                         | Research Coordinator                                    | NICHD Neonatal Research Network                                                            |
| Jon E.                            | Tyson       |                       | MD MPH           | Department of Pediatrics, McGovern   | Houston, TX, USA                         | Principal Investigator                                  | NICHD Neonatal Research Network                                                            |
| Laura L.                          | Whitely     |                       | MD               | Department of Pediatrics, McGovern   | Houston, TX, USA                         | Follow-up Examiner                                      | NICHD Neonatal Research Network                                                            |
| Sharon L.                         | Wright      |                       | MT (ASCP)        | Department of Pediatrics, McGovern   | Houston, TX, USA                         |                                                         | NICHD Neonatal Research Network                                                            |
| Anna M.                           | Dusick      |                       | MD               | Department of Pediatrics, Indiana Ur | Indianapolis, IN, USA                    | Follow-up Principal Inv                                 | NICHD Neonatal Research Network                                                            |
| Susan                             | Gunn        |                       | NNP-BC CC        | Department of Pediatrics, Indiana Ur | Indianapolis, IN, USA                    | Research Nurse                                          | NICHD Neonatal Research Network                                                            |
| Faithe                            | Hamer       |                       | BS               | Department of Pediatrics, Indiana Ur | Indianapolis, IN, USA                    | Follow-up Coordinator                                   | NICHD Neonatal Research Network                                                            |
| Dianne E.                         | Herron      |                       | RN CCRC          | Department of Pediatrics, Indiana Ur | Indianapolis, IN, USA                    | Research Coordinator                                    | NICHD Neonatal Research Network                                                            |
| Abbey C.                          | Hines       |                       | PsyD             | Department of Pediatrics, Indiana Ur | Indianapolis, IN, USA                    | Follow-up Examiner                                      | NICHD Neonatal Research Network                                                            |
| Jeffery                           | Joyce       |                       | CCRC             | Department of Pediatrics, Indiana Ur | Indianapolis, IN, USA                    | Research Coordinator                                    | NICHD Neonatal Research Network                                                            |
| James A.                          | Lemons      |                       | MD               | Department of Pediatrics, Indiana Ur | Indianapolis, IN, USA                    | Co-Principal Investigat                                 | NICHD Neonatal Research Network                                                            |
| Carolyn                           | Lytle       |                       | MD MPH           | Department of Pediatrics, Indiana Ur | Indianapolis, IN, USA                    | Follow-up Examiner                                      | NICHD Neonatal Research Network                                                            |
| Lucy C.                           | Miller      |                       | RN BSN CC        | Department of Pediatrics, Indiana Ur | Indianapolis, IN, USA                    | Research Coordinator                                    | NICHD Neonatal Research Network                                                            |
| Heike M.                          | Minnich     |                       | PsyD HSP         | Department of Pediatrics, Indiana Ur | Indianapolis, IN, USA                    | Follow-up Examiner                                      | NICHD Neonatal Research Network                                                            |
| Lu-Ann                            | Papile      |                       | MD               | Department of Pediatrics, Indiana Ur | Indianapolis, IN, USA                    | Follow-up Principal Inv                                 | NICHD Neonatal Research Network                                                            |
| Brenda B.                         | Poindexter  |                       | MD MS            | Department of Pediatrics, Indiana Ur | Indianapolis, IN, USA                    | Co-Principal Investigat                                 | NICHD Neonatal Research Network                                                            |
| Leslie                            | Richard     |                       | RN               | Department of Pediatrics, Indiana Ur | Indianapolis, IN, USA                    | Follow-up Coordinator                                   | NICHD Neonatal Research Network                                                            |
| Lucy C.                           | Smiley      |                       | CCRC             | Department of Pediatrics, Indiana Ur | Indianapolis, IN, USA                    | Research Nurse                                          | NICHD Neonatal Research Network                                                            |
| Gregory M.                        | Sokol       |                       | MD               | Department of Pediatrics, Indiana Ur | Indianapolis, IN, USA                    | Co-Principal Investigat                                 | NICHD Neonatal Research Network                                                            |
| Leslie Dawn                       | Wilson      |                       | BSN CCRC         | Department of Pediatrics, Indiana Ur | Indianapolis, IN, USA                    | Research Coordinator                                    | NICHD Neonatal Research Network                                                            |

Supplemental Online Content: Nonauthor Collaborators

\*First name, last name, and suffix (if applicable) are required and will appear in PubMed.

| *First Name and Middle Initial(s) | *Last Name      | *Suffix (eg, Jr, III) | Academic Degrees | Institution                          | Location (city, state/province, country) | Role or Contribution, eg, chair, principal investigator | Group (if more than 1 Group listed in the byline) and/or Subgroup (eg, Steering Committee) |
|-----------------------------------|-----------------|-----------------------|------------------|--------------------------------------|------------------------------------------|---------------------------------------------------------|--------------------------------------------------------------------------------------------|
| Michael J.                        | Acarregui       |                       | MD MBA           | Department of Pediatrics, University | Iowa City, IA, USA                       | Follow-up Principal Inv                                 | NICHD Neonatal Research Network                                                            |
| Tarah T.                          | Colaizy         |                       | MD MPH           | Department of Pediatrics, University | Iowa City, IA, USA                       | Follow-up Principal Inv                                 | NICHD Neonatal Research Network                                                            |
| John M.                           | Dagle           |                       | MD PhD           | Department of Pediatrics, University | Iowa City, IA, USA                       | Study Investigator                                      | NICHD Neonatal Research Network                                                            |
| Diane L.                          | Eastman         |                       | RN CPNP M        | Department of Pediatrics, University | Iowa City, IA, USA                       | Follow-up Coordinator                                   | NICHD Neonatal Research Network                                                            |
| Claire A.                         | Goeke           |                       | RN               | Department of Pediatrics, University | Iowa City, IA, USA                       | Research Nurse                                          | NICHD Neonatal Research Network                                                            |
| Karen J.                          | Johnson         |                       | RN BSN           | Department of Pediatrics, University | Iowa City, IA, USA                       | Research Coordinator                                    | NICHD Neonatal Research Network                                                            |
| Jonathan M.                       | Klein           |                       | MD               | Department of Pediatrics, University | Iowa City, IA, USA                       | Study Investigator                                      | NICHD Neonatal Research Network                                                            |
| Nancy J.                          | Krutzfield      |                       | RN MA            | Department of Pediatrics, University | Iowa City, IA, USA                       | Research Nurse                                          | NICHD Neonatal Research Network                                                            |
| Mendi L.                          | Schmelzel       |                       | MSN RN           | Department of Pediatrics, University | Iowa City, IA, USA                       | Research Nurse                                          | NICHD Neonatal Research Network                                                            |
| Jacky R.                          | Walker          |                       | RN               | Department of Pediatrics, University | Iowa City, IA, USA                       | Research Nurse                                          | NICHD Neonatal Research Network                                                            |
| John A.                           | Widness         |                       | MD               | Department of Pediatrics, University | Iowa City, IA, USA                       | Co-Principal Investigator                               | NICHD Neonatal Research Network                                                            |
| Donia B.                          | Bass            |                       | MS ARNP N        | Center for Research, Education, and  | Des Moines, IA, USA                      | Research Coordinator                                    | NICHD Neonatal Research Network                                                            |
| Dan L.                            | Ellsbury        |                       | MD               | Center for Research, Education, and  | Des Moines, IA, USA                      | Site Investigator                                       | NICHD Neonatal Research Network                                                            |
| Tracy L.                          | Tud             |                       | RN               | Center for Research, Education, and  | Des Moines, IA, USA                      | Research Coordinator                                    | NICHD Neonatal Research Network                                                            |
| Charles R.                        | Bauer           |                       | MD               | University of Miami Miller School of | Miami, FL                                | Follow-up Principal Inv                                 | NICHD Neonatal Research Network                                                            |
| Maria                             | Calejo          |                       | MEd              | University of Miami Miller School of | Miami, FL                                | Follow-up Examiner                                      | NICHD Neonatal Research Network                                                            |
| Shahnaz                           | Duara           |                       | MD               | University of Miami Miller School of | Miami, FL                                | Principal Investigator                                  | NICHD Neonatal Research Network                                                            |
| Ruth                              | Everett-Thomas  |                       | RN MSN           | University of Miami Miller School of | Miami, FL                                | Research Coordinator                                    | NICHD Neonatal Research Network                                                            |
| Sylvia                            | Fajardo-Hiriart |                       | MD               | University of Miami Miller School of | Miami, FL                                | Follow-up Examiner                                      | NICHD Neonatal Research Network                                                            |
| Silvia M.                         | Frade Eguaras   |                       | BA               | University of Miami Miller School of | Miami, FL                                | Follow-up Examiner                                      | NICHD Neonatal Research Network                                                            |
| Andrea                            | Garcia          |                       | MS               | University of Miami Miller School of | Miami, FL                                | Follow-up Examiner                                      | NICHD Neonatal Research Network                                                            |
| Michelle                          | Harwood Berkov  |                       | PhD              | University of Miami Miller School of | Miami, FL                                | Follow-up Examiner                                      | NICHD Neonatal Research Network                                                            |
| Helina                            | Pierre          |                       | BA               | University of Miami Miller School of | Miami, FL                                | Follow-up Examiner                                      | NICHD Neonatal Research Network                                                            |
| Arielle                           | Riguard         |                       | MD               | University of Miami Miller School of | Miami, FL                                | Follow-up Examiner                                      | NICHD Neonatal Research Network                                                            |
| Alexandra                         | Stoerger        |                       | BA               | University of Miami Miller School of | Miami, FL                                | Follow-up Examiner                                      | NICHD Neonatal Research Network                                                            |
| Lisa                              | Gaetano         |                       | RN MSN           | Department of Pediatrics, Children's | Kansas City, MO, USA                     | Research Nurse                                          | NICHD Neonatal Research Network                                                            |
| Cheri                             | Gauldin         |                       | RN BSN CC        | Department of Pediatrics, Children's | Kansas City, MO, USA                     | Research Coordinator                                    | NICHD Neonatal Research Network                                                            |
| Anne M.                           | Holmes          |                       | RN MSN M         | Department of Pediatrics, Children's | Kansas City, MO, USA                     | Research Nurse                                          | NICHD Neonatal Research Network                                                            |
| Kathy                             | Johnson         |                       | RN CCRC          | Department of Pediatrics, Children's | Kansas City, MO, USA                     | Research Nurse                                          | NICHD Neonatal Research Network                                                            |
| Howard W.                         | Kilbride        |                       | MD               | Department of Pediatrics, Children's | Kansas City, MO, USA                     | Follow-up Principal Inv                                 | NICHD Neonatal Research Network                                                            |
| Eugenia K.                        | Pallotto        |                       | MD MSCE          | Department of Pediatrics, University | Kansas City, MO, USA                     | Site Investigator                                       | NICHD Neonatal Research Network                                                            |
| Prabhu S.                         | Parimi          |                       | MD               | Department of Pediatrics, University | Kansas City, MO, USA                     | Site Investigator                                       | NICHD Neonatal Research Network                                                            |
| Allison                           | Scott           |                       | RNC-NIC BS       | Department of Pediatrics, Children's | Kansas City, MO, USA                     | Research Coordinator                                    | NICHD Neonatal Research Network                                                            |

Supplemental Online Content: Nonauthor Collaborators

\*First name, last name, and suffix (if applicable) are required and will appear in PubMed.

| *First Name and Middle Initial(s) | *Last Name    | *Suffix (eg, Jr, III) | Academic Degrees | Institution                          | Location (city, state/province, country) | Role or Contribution, eg, chair, principal investigator | Group (if more than 1 Group listed in the byline) and/or Subgroup (eg, Steering Committee) |
|-----------------------------------|---------------|-----------------------|------------------|--------------------------------------|------------------------------------------|---------------------------------------------------------|--------------------------------------------------------------------------------------------|
| William E.                        | Truog         |                       | MD               | Department of Pediatrics, Children's | Kansas City, MO, USA                     | Principal Investigator                                  | NICHD Neonatal Research Network                                                            |
| Gail E.                           | Besner        |                       | MD               |                                      | Columbus, OH, USA                        | Surgeon                                                 | NICHD Neonatal Research Network                                                            |
| Erna                              | Clark         |                       | BA               | Department of Pediatrics, Nationwide | Columbus, OH, USA                        | Research Assistant                                      | NICHD Neonatal Research Network                                                            |
| Christine A.                      | Fortney       |                       | PhD RN           | Department of Pediatrics, Nationwide | Columbus, OH, USA                        | Research Coordinator                                    | NICHD Neonatal Research Network                                                            |
| Julie                             | Gutentag      |                       | RN BSN           | Department of Pediatrics, Nationwide | Columbus, OH, USA                        | Research Nurse                                          | NICHD Neonatal Research Network                                                            |
| Sudarshan R.                      | Jadcherla     |                       | MD FRCP (I)      | Department of Pediatrics, Nationwide | Columbus, OH, USA                        | Co-Principal Investigator                               | NICHD Neonatal Research Network                                                            |
| Patricia                          | Luzader       |                       | RN               | Department of Pediatrics, Nationwide | Columbus, OH, USA                        | Research Coordinator                                    | NICHD Neonatal Research Network                                                            |
| Nathalie L.                       | Maitre        |                       | MD PhD           | Department of Pediatrics, Nationwide | Columbus, OH, USA                        |                                                         | NICHD Neonatal Research Network                                                            |
| Leif D.                           | Nelin         |                       | MD               | Department of Pediatrics, Nationwide | Columbus, OH, USA                        | Principal Investigator                                  | NICHD Neonatal Research Network                                                            |
| Nehal A.                          | Parikh        |                       | DO MS            | Department of Pediatrics, Nationwide | Columbus, OH, USA                        | Site Investigator                                       | NICHD Neonatal Research Network                                                            |
| Courtney                          | Park          |                       | RN BSN           | Department of Pediatrics, Nationwide | Columbus, OH, USA                        | Research Nurse                                          | NICHD Neonatal Research Network                                                            |
| Pablo J.                          | Sánchez       |                       | MD               | Department of Pediatrics, Nationwide | Columbus, OH, USA                        | Site Investigator                                       | NICHD Neonatal Research Network                                                            |
| Julie C.                          | Shadd         |                       | BSN RD           | Department of Pediatrics, Nationwide | Columbus, OH, USA                        | Research Assistant                                      | NICHD Neonatal Research Network                                                            |
| Melanie                           | Stein         |                       | RRT BBA          | Department of Pediatrics, Nationwide | Columbus, OH, USA                        | Research Assistant                                      | NICHD Neonatal Research Network                                                            |
| Margaret                          | Sullivan      |                       | BS               | Department of Pediatrics, Nationwide | Columbus, OH, USA                        | Research Assistant                                      | NICHD Neonatal Research Network                                                            |
| Andrew A.                         | Bremer        |                       | MD PhD           | Eunice Kennedy Shriver National Inst | Bethesda, MD, USA                        | Program Officer                                         | NICHD Neonatal Research Network                                                            |
| Rosemary D.                       | Higgins       |                       | MD               | Eunice Kennedy Shriver National Inst | Bethesda, MD, USA                        | Program Scientist                                       | NICHD Neonatal Research Network                                                            |
| Stephanie                         | Wilson Archer |                       | MA               | Eunice Kennedy Shriver National Inst | Bethesda, MD, USA                        | Program Coordinator                                     | NICHD Neonatal Research Network                                                            |
| Soraya                            | Abbasi        |                       | MD               | Department of Pediatrics, University | Philadelphia, PA, USA                    | Site Investigator                                       | NICHD Neonatal Research Network                                                            |
| Judy C.                           | Bernbaum      |                       | MD               | Department of Pediatrics, University | Philadelphia, PA, USA                    | Follow-up Examiner                                      | NICHD Neonatal Research Network                                                            |
| Christine                         | Catts         |                       | CRNP             | Department of Pediatrics, University | Philadelphia, PA, USA                    | Research Assistant                                      | NICHD Neonatal Research Network                                                            |
| Aasma S.                          | Chaudhary     |                       | BS RRT           | Department of Pediatrics, University | Philadelphia, PA, USA                    | Research Coordinator                                    | NICHD Neonatal Research Network                                                            |
| Noah                              | Cook          |                       | MD               | Department of Pediatrics, University | Philadelphia, PA, USA                    |                                                         | NICHD Neonatal Research Network                                                            |
| Dara M.                           | Cucinotta     |                       | RN               | Department of Pediatrics, University | Philadelphia, PA, USA                    | Research Coordinator                                    | NICHD Neonatal Research Network                                                            |
| Eric C.                           | Eichenwald    |                       | MD               | Department of Pediatrics, University | Philadelphia, PA, USA                    | Principal Investigator                                  | NICHD Neonatal Research Network                                                            |
| Marsha                            | Gerdes        |                       | PhD              | Department of Pediatrics, University | Philadelphia, PA, USA                    | Follow-up Examiner                                      | NICHD Neonatal Research Network                                                            |
| Sarvin                            | Ghavam        |                       | MD               | Department of Pediatrics, University | Philadelphia, PA, USA                    | Site Investigator                                       | NICHD Neonatal Research Network                                                            |
| Hallam                            | Hurt          |                       | MD               | Department of Pediatrics, University | Philadelphia, PA, USA                    |                                                         | NICHD Neonatal Research Network                                                            |
| Haresh                            | Kirpalani     |                       | BM MSc           | Department of Pediatrics, University | Philadelphia, PA, USA                    | Co-Principal Investigator                               | NICHD Neonatal Research Network                                                            |
| Toni                              | Mancini       |                       | RN BSN CC        | Department of Pediatrics, University | Philadelphia, PA, USA                    | Research Coordinator                                    | NICHD Neonatal Research Network                                                            |
| Barbara                           | Schmidt       |                       | MD MSc           | Department of Pediatrics, University | Philadelphia, PA, USA                    | Principal Investigator                                  | NICHD Neonatal Research Network                                                            |
| Jonathan M.                       | Snyder        |                       | RN BSN           | Department of Pediatrics, University | Philadelphia, PA, USA                    | Research Nurse                                          | NICHD Neonatal Research Network                                                            |
| Sarith                            | Vangala       |                       | RN MSN           | Department of Pediatrics, University | Philadelphia, PA, USA                    | Research Nurse                                          | NICHD Neonatal Research Network                                                            |



## Supplemental Online Content: Nonauthor Collaborators

\*First name, last name, and suffix (if applicable) are required and will appear in PubMed.

| *First Name and Middle Initial(s) | *Last Name     | *Suffix (eg, Jr, III) | Academic Degrees | Institution                           | Location (city, state/province, country) | Role or Contribution, eg, chair, principal investigator | Group (if more than 1 Group listed in the byline) and/or Subgroup (eg, Steering Committee) |
|-----------------------------------|----------------|-----------------------|------------------|---------------------------------------|------------------------------------------|---------------------------------------------------------|--------------------------------------------------------------------------------------------|
| Kristina                          | Ziolkowski     |                       | CMA(AAM)         | Department of Pediatrics, University  | Philadelphia, PA, USA                    |                                                         | NICHD Neonatal Research Network                                                            |
| Julie                             | Babish Johnson |                       | MSW              | University of Rochester School of Me  | Rochester, NY, USA                       | Follow-up Examiner                                      | NICHD Neonatal Research Network                                                            |
| Kyle                              | Binion         |                       | BS               | University of Rochester School of Me  | Rochester, NY, USA                       | Research Assistant                                      | NICHD Neonatal Research Network                                                            |
| Melissa                           | Bowman         |                       | RN NP            | University of Rochester School of Me  | Rochester, NY, USA                       |                                                         | NICHD Neonatal Research Network                                                            |
| Erica                             | Burnell        |                       | RN               | University of Rochester School of Me  | Rochester, NY, USA                       | Research Nurse                                          | NICHD Neonatal Research Network                                                            |
| Carl T.                           | D'Angio        |                       | MD               | University of Rochester School of Me  | Rochester, NY, USA                       | Principal Investigator                                  | NICHD Neonatal Research Network                                                            |
| Caitlin                           | Fallone        |                       | MA               | University of Rochester School of Me  | Rochester, NY, USA                       |                                                         | NICHD Neonatal Research Network                                                            |
| Osman                             | Farooq         |                       | MD               | University of Rochester School of Me  | Rochester, NY, USA                       |                                                         | NICHD Neonatal Research Network                                                            |
| Ronnie                            | Guillet        |                       | MD PhD           | University of Rochester School of Me  | Rochester, NY, USA                       | Co-Principal Investigator                               | NICHD Neonatal Research Network                                                            |
| Cassandra A.                      | Horihan        |                       | MS               | University of Rochester School of Me  | Rochester, NY, USA                       | Research Coordinator                                    | NICHD Neonatal Research Network                                                            |
| Julianne                          | Hunn           |                       | MSHCM            | University of Rochester School of Me  | Rochester, NY, USA                       |                                                         | NICHD Neonatal Research Network                                                            |
| Diane                             | Hust           |                       | MS RN CS         | University of Rochester School of Me  | Rochester, NY, USA                       | Follow-up Coordinator                                   | NICHD Neonatal Research Network                                                            |
| Rosemary L.                       | Jensen         |                       |                  | University of Rochester School of Me  | Rochester, NY, USA                       | Follow-up Coordinator                                   | NICHD Neonatal Research Network                                                            |
| Rachel                            | Jones          |                       |                  | University of Rochester School of Me  | Rochester, NY, USA                       | Research Assistant                                      | NICHD Neonatal Research Network                                                            |
| Jennifer                          | Kachelmeyer    |                       | BS               | University of Rochester School of Me  | Rochester, NY, USA                       | Research Assistant                                      | NICHD Neonatal Research Network                                                            |
| Alison                            | Kent           |                       | BMBS FRAC        | University of Rochester School of Me  | Rochester, NY, USA                       | Site Investigator                                       | NICHD Neonatal Research Network                                                            |
| Emily                             | Kushner        |                       | MA               | University of Rochester School of Me  | Rochester, NY, USA                       | Follow-up Examiner                                      | NICHD Neonatal Research Network                                                            |
| Deanna                            | Maffett        |                       | RN               | University of Rochester School of Me  | Rochester, NY, USA                       | Research Nurse                                          | NICHD Neonatal Research Network                                                            |
| Kimberly G.                       | McKee          |                       | MPH              | University of Rochester School of Me  | Rochester, NY, USA                       |                                                         | NICHD Neonatal Research Network                                                            |
| Joan                              | Merzbach       |                       | LMSW             | University of Rochester School of Me  | Rochester, NY, USA                       | Follow-up Examiner                                      | NICHD Neonatal Research Network                                                            |
| Gary J.                           | Myers          |                       | MD               | University of Rochester School of Me  | Rochester, NY, USA                       | Follow-up Principal Inv                                 | NICHD Neonatal Research Network                                                            |
| Constance                         | Orme           |                       | BA               | University of Rochester School of Me  | Rochester, NY, USA                       | Research Assistant                                      | NICHD Neonatal Research Network                                                            |
| Dale L.                           | Phelps         |                       | MD               | University of Rochester School of Me  | Rochester, NY, USA                       | Principal Investigator                                  | NICHD Neonatal Research Network                                                            |
| Diane M.                          | Prinzing       |                       | AAS              | University of Rochester School of Me  | Rochester, NY, USA                       | Research Nurse                                          | NICHD Neonatal Research Network                                                            |
| Linda J.                          | Reubens        |                       | RN CCRC          | University of Rochester School of Me  | Rochester, NY, USA                       | Research Coordinator                                    | NICHD Neonatal Research Network                                                            |
| Daisy                             | Rochez         |                       | BS MHA           | University of Rochester School of Me  | Rochester, NY, USA                       | Research Assistant                                      | NICHD Neonatal Research Network                                                            |
| Mary                              | Rowan          |                       | RN               | University of Rochester School of Me  | Rochester, NY, USA                       | Research Nurse                                          | NICHD Neonatal Research Network                                                            |
| Premini                           | Sabaratnam     |                       | MPH              | University of Rochester School of Me  | Rochester, NY, USA                       | Research Assistant                                      | NICHD Neonatal Research Network                                                            |
| Ann Marie                         | Scorsone       |                       | MS CCRC          | University of Rochester School of Me  | Rochester, NY, USA                       | Research Coordinator                                    | NICHD Neonatal Research Network                                                            |
| Holly I.M.                        | Wadkins        |                       | MA               | University of Rochester School of Me  | Rochester, NY, USA                       | Research Coordinator                                    | NICHD Neonatal Research Network                                                            |
| Kelley                            | Yost           |                       | PhD              | University of Rochester School of Me  | Rochester, NY, USA                       | Follow-up Examiner                                      | NICHD Neonatal Research Network                                                            |
| Lauren                            | Zwetsch        |                       | RN MS PNF        | University of Rochester School of Me  | Rochester, NY, USA                       | Study Investigator                                      | NICHD Neonatal Research Network                                                            |
| Carla M.                          | Bann           |                       | PhD              | Social, Statistical and Environmental | Research Triangle Park, NC               | Statistician                                            | NICHD Neonatal Research Network                                                            |

## Supplemental Online Content: Nonauthor Collaborators

\*First name, last name, and suffix (if applicable) are required and will appear in PubMed.

| *First Name and Middle Initial(s) | *Last Name     | *Suffix (eg, Jr, III) | Academic Degrees | Institution                           | Location (city, state/province, country) | Role or Contribution, eg, chair, principal investigator | Group (if more than 1 Group listed in the byline) and/or Subgroup (eg, Steering Committee) |
|-----------------------------------|----------------|-----------------------|------------------|---------------------------------------|------------------------------------------|---------------------------------------------------------|--------------------------------------------------------------------------------------------|
| Margaret M.                       | Crawford       |                       | BS CCRP          | Social, Statistical and Environmental | Rockville, MD, USA                       | Research Coordinator                                    | NICHD Neonatal Research Network                                                            |
| Jenna                             | Gabrio         |                       | MPH CCRP         | Social, Statistical and Environmental | Research Triangle Park, NC               | Research Coordinator                                    | NICHD Neonatal Research Network                                                            |
| Marie G.                          | Gantz          |                       | PhD              | Social, Statistical and Environmental | Research Triangle Park, NC               | Statistician                                            | NICHD Neonatal Research Network                                                            |
| Betty K.                          | Hastings       |                       | AAS              | Social, Statistical and Environmental | Research Triangle Park, NC               | Research Coordinator                                    | NICHD Neonatal Research Network                                                            |
| David                             | Leblond        |                       | BS               | Social, Statistical and Environmental | Research Triangle Park, NC               | Database Programmer                                     | NICHD Neonatal Research Network                                                            |
| Jamie E.                          | Newman         |                       | PhD MPH          | Social, Statistical and Environmental | Research Triangle Park, NC               | Follow-up Coordinator                                   | NICHD Neonatal Research Network                                                            |
| Jeanette                          | O'Donnell Auma |                       | BS               | Social, Statistical and Environmental | Research Triangle Park, NC               | Database Programmer                                     | NICHD Neonatal Research Network                                                            |
| Carolyn M.                        | Petrie Huitema |                       | MS CCRP          | Social, Statistical and Environmental | Rockville, MD, USA                       | Research Coordinator                                    | NICHD Neonatal Research Network                                                            |
| W. Kenneth                        | Poole          |                       | PhD              | Social, Statistical and Environmental | Research Triangle Park, NC               | Co-Principal Investigator                               | NICHD Neonatal Research Network                                                            |
| Dennis                            | Wallace        |                       | PhD              | Social, Statistical and Environmental | Research Triangle Park, NC               | Co-Principal Investigator                               | NICHD Neonatal Research Network                                                            |
| Kristin M.                        | Zaterka-Baxter |                       | RN BSN CC        | Social, Statistical and Environmental | Research Triangle Park, NC               | Research Coordinator                                    | NICHD Neonatal Research Network                                                            |
| Michelle L.                       | Baack          |                       | MD               | Department of Pediatrics, Sanford Sc  | Sioux Falls, SD                          | Site Investigator                                       | NICHD Neonatal Research Network                                                            |
| Megan                             | Broadbent      |                       | RN BSN           | Department of Pediatrics, Sanford Sc  | Sioux Falls, SD                          | Research Nurse                                          | NICHD Neonatal Research Network                                                            |
| Chelsey                           | Elenkiwich     |                       | RN BSN           | Department of Pediatrics, Sanford Sc  | Sioux Falls, SD                          | Research Nurse                                          | NICHD Neonatal Research Network                                                            |
| Megan M.                          | Henning        |                       | RN               | Department of Pediatrics, Sanford Sc  | Sioux Falls, SD                          | Research Nurse                                          | NICHD Neonatal Research Network                                                            |
| Laurie A.                         | Hogden         |                       | MD               | Department of Pediatrics, Sanford Sc  | Sioux Falls, SD                          | Site Investigator                                       | NICHD Neonatal Research Network                                                            |
| Marian M.                         | Adams          |                       | MD               | Department of Pediatrics, Division of | Palo Alto, CA, USA                       |                                                         | NICHD Neonatal Research Network                                                            |
| Dona                              | Bahmani        |                       | MD               | Department of Pediatrics, Division of | Palo Alto, CA, USA                       |                                                         | NICHD Neonatal Research Network                                                            |
| M. Bethany                        | Ball           |                       | BS CCRC          | Department of Pediatrics, Division of | Palo Alto, CA, USA                       | Research Coordinator                                    | NICHD Neonatal Research Network                                                            |
| Barbara                           | Bentley        |                       | PsychD MS        | Department of Pediatrics, Division of | Palo Alto, CA, USA                       | Follow-up Examiner                                      | NICHD Neonatal Research Network                                                            |
| Elizabeth F.                      | Bruno          |                       | PhD              | Department of Pediatrics, Division of | Palo Alto, CA, USA                       | Follow-up Examiner                                      | NICHD Neonatal Research Network                                                            |
| Valerie Y.                        | Chock          |                       | MD MS Epi        | Department of Pediatrics, Division of | Palo Alto, CA, USA                       | Co-Principal Investigator                               | NICHD Neonatal Research Network                                                            |
| Alexis S.                         | Davis          |                       | MD MS Epi        | Department of Pediatrics, Division of | Palo Alto, CA, USA                       | Study Investigator                                      | NICHD Neonatal Research Network                                                            |
| Maria Elena                       | DeAnda         |                       | PhD              | Department of Pediatrics, Division of | Palo Alto, CA, USA                       | Follow-up Examiner                                      | NICHD Neonatal Research Network                                                            |
| Anne M.                           | DeBattista     |                       | RN PNP-C F       | Department of Pediatrics, Division of | Palo Alto, CA, USA                       | Follow-up Examiner                                      | NICHD Neonatal Research Network                                                            |
| Beth A.                           | Earhart        |                       | PsyD             | Department of Pediatrics, Division of | Palo Alto, CA, USA                       |                                                         | NICHD Neonatal Research Network                                                            |
| Lynne C.                          | Huffman        |                       | MD               | Department of Pediatrics, Division of | Palo Alto, CA, USA                       |                                                         | NICHD Neonatal Research Network                                                            |
| Magdy                             | Ismael         |                       | MD MPH           | Department of Pediatrics, Division of | Palo Alto, CA, USA                       |                                                         | NICHD Neonatal Research Network                                                            |
| Jean G.                           | Kohn           |                       | MD MPH           | Department of Pediatrics, Division of | Palo Alto, CA, USA                       | Follow-up Examiner                                      | NICHD Neonatal Research Network                                                            |
| Casey E.                          | Krueger        |                       | PhD              | Department of Pediatrics, Division of | Palo Alto, CA, USA                       | Follow-up Examiner                                      | NICHD Neonatal Research Network                                                            |
| Julie C.                          | Lee-Ancas      |                       | PhD              | Department of Pediatrics, Division of | Palo Alto, CA, USA                       | Follow-up Examiner                                      | NICHD Neonatal Research Network                                                            |
| Janice                            | Lowe           |                       | MD               | Department of Pediatrics, Division of | Palo Alto, CA, USA                       |                                                         | NICHD Neonatal Research Network                                                            |
| Ryan E.                           | Lucash         |                       | PhD              | Department of Pediatrics, Division of | Palo Alto, CA, USA                       | Follow-up Examiner                                      | NICHD Neonatal Research Network                                                            |

## Supplemental Online Content: Nonauthor Collaborators

\*First name, last name, and suffix (if applicable) are required and will appear in PubMed.

| *First Name and Middle Initial(s) | *Last Name | *Suffix (eg, Jr, III) | Academic Degrees | Institution                            | Location (city, state/province, country) | Role or Contribution, eg, chair, principal investigator | Group (if more than 1 Group listed in the byline) and/or Subgroup (eg, Steering Committee) |
|-----------------------------------|------------|-----------------------|------------------|----------------------------------------|------------------------------------------|---------------------------------------------------------|--------------------------------------------------------------------------------------------|
| Andrew W.                         | Palmquist  |                       | RN BSN           | Department of Pediatrics, Division of  | Palo Alto, CA, USA                       | Research Nurse                                          | NICHD Neonatal Research Network                                                            |
| Jessica                           | Patel      |                       | PhD              | Department of Pediatrics, Division of  | Palo Alto, CA, USA                       |                                                         | NICHD Neonatal Research Network                                                            |
| Melinda S.                        | Proud      |                       | RCP              | Department of Pediatrics, Division of  | Palo Alto, CA, USA                       | Research Assistant                                      | NICHD Neonatal Research Network                                                            |
| Elizabeth N.                      | Reichert   |                       | MA CCRC          | Department of Pediatrics, Division of  | Palo Alto, CA, USA                       | Research Assistant                                      | NICHD Neonatal Research Network                                                            |
| Dharshi                           | Sivakumar  |                       | MD               | Department of Pediatrics, Division of  | Palo Alto, CA, USA                       | Follow-up Examiner                                      | NICHD Neonatal Research Network                                                            |
| Nicholas H.                       | St. John   |                       | PhD              | Department of Pediatrics, Division of  | Palo Alto, CA, USA                       | Follow-up Examiner                                      | NICHD Neonatal Research Network                                                            |
| David K.                          | Stevenson  |                       | MD               | Department of Pediatrics, Division of  | Palo Alto, CA, USA                       | Principal Investigator                                  | NICHD Neonatal Research Network                                                            |
| Heather L.                        | Taylor     |                       | PhD              | Department of Pediatrics, Division of  | Palo Alto, CA, USA                       |                                                         | NICHD Neonatal Research Network                                                            |
| Krisa P.                          | Van Meurs  |                       | MD               | Department of Pediatrics, Division of  | Palo Alto, CA, USA                       | Principal Investigator                                  | NICHD Neonatal Research Network                                                            |
| Natalie                           | Wager      |                       | PsyD             | Department of Pediatrics, Division of  | Palo Alto, CA, USA                       | Follow-up Examiner                                      | NICHD Neonatal Research Network                                                            |
| R. Jordan                         | Williams   |                       | BA               | Department of Pediatrics, Division of  | Palo Alto, CA, USA                       | Research Assistant                                      | NICHD Neonatal Research Network                                                            |
| Hali                              | Weiss      |                       | MD               | Department of Pediatrics, Division of  | Palo Alto, CA, USA                       |                                                         | NICHD Neonatal Research Network                                                            |
| Ana K.                            | Brussa     |                       | MS OTR/L         | Department of Pediatrics, Division of  | Boston, MA, USA                          | Follow-up Examiner                                      | NICHD Neonatal Research Network                                                            |
| Paige T.                          | Church     |                       | MD               | Department of Pediatrics, Division of  | Boston, MA, USA                          | Follow-up Principal Inv                                 | NICHD Neonatal Research Network                                                            |
| John M.                           | Fiascone   |                       | MD               | Department of Pediatrics, Division of  | Boston, MA, USA                          | Co-Principal Investigat                                 | NICHD Neonatal Research Network                                                            |
| Ivan D.                           | Frantz     | III                   | MD               | Department of Pediatrics, Division of  | Boston, MA, USA                          | Principal Investigator                                  | NICHD Neonatal Research Network                                                            |
| Anne                              | Furey      |                       | MPH              | Department of Pediatrics, Division of  | Boston, MA, USA                          |                                                         | NICHD Neonatal Research Network                                                            |
| Anne                              | Kurfiss    |                       | MPH              | Department of Pediatrics, Division of  | Boston, MA, USA                          |                                                         | NICHD Neonatal Research Network                                                            |
| Brenda L.                         | MacKinnon  |                       | RN BSN           | Department of Pediatrics, Division of  | Boston, MA, USA                          | Research Coordinator                                    | NICHD Neonatal Research Network                                                            |
| Elisabeth C.                      | McGowan    |                       | MD               | Department of Pediatrics, Division of  | Boston, MA, USA                          | Follow-up Principal Inv                                 | NICHD Neonatal Research Network                                                            |
| Ellen                             | Nylen      |                       | RN BSN           | Department of Pediatrics, Division of  | Boston, MA, USA                          | Research Nurse                                          | NICHD Neonatal Research Network                                                            |
| Cecelia E.                        | Sibley     |                       | PT MHA           | Department of Pediatrics, Division of  | Boston, MA, USA                          | Follow-up Examiner                                      | NICHD Neonatal Research Network                                                            |
| Teresa                            | Chanlaw    |                       | MPH              | Department of Pediatrics, University   | Los Angeles, CA, USA                     | Research Coordinator                                    | NICHD Neonatal Research Network                                                            |
| Uday                              | Devaskar   |                       | MD               | Department of Pediatrics, University   | Los Angeles, CA, USA                     | Principal Investigator                                  | NICHD Neonatal Research Network                                                            |
| Meena                             | Garg       |                       | MD               | Department of Pediatrics, University   | Los Angeles, CA, USA                     | Co-Principal Investigat                                 | NICHD Neonatal Research Network                                                            |
| Rachel                            | Geller     |                       | RN BSN           | Department of Pediatrics, University   | Los Angeles, CA, USA                     | Research Coordinator                                    | NICHD Neonatal Research Network                                                            |
| Isabell B.                        | Purdy      |                       | PNP NNP P        | Department of Pediatrics, University   | Los Angeles, CA, USA                     | Follow-up Principal Inv                                 | NICHD Neonatal Research Network                                                            |
| Kathy                             | Arnell     |                       | RNC              | Division of Neonatology, University of | San Diego, CA, USA                       | Research Coordinator                                    | NICHD Neonatal Research Network                                                            |
| Clarence                          | Demetrio   |                       | RN               | Division of Neonatology, University of | San Diego, CA, USA                       | Research Coordinator                                    | NICHD Neonatal Research Network                                                            |
| Neil N.                           | Finer      |                       | MD               | Division of Neonatology, University of | San Diego, CA, USA                       | Principal Investigator                                  | NICHD Neonatal Research Network                                                            |
| Martha G.                         | Fuller     |                       | PhD RN MS        | Division of Neonatology, University of | San Diego, CA, USA                       | Follow-up Coordinator                                   | NICHD Neonatal Research Network                                                            |
| Christopher                       | Henderson  |                       | AS CRTT          | Division of Neonatology, University of | San Diego, CA, USA                       | Research Coordinator                                    | NICHD Neonatal Research Network                                                            |
| David                             | Kaegi      |                       | MD               | Division of Neonatology, University of | San Diego, CA, USA                       | Study Investigator                                      | NICHD Neonatal Research Network                                                            |

## Supplemental Online Content: Nonauthor Collaborators

\*First name, last name, and suffix (if applicable) are required and will appear in PubMed.

| *First Name and Middle Initial(s) | *Last Name      | *Suffix (eg, Jr, III) | Academic Degrees | Institution                                       | Location (city, state/province, country) | Role or Contribution, eg, chair, principal investigator | Group (if more than 1 Group listed in the byline) and/or Subgroup (eg, Steering Committee) |
|-----------------------------------|-----------------|-----------------------|------------------|---------------------------------------------------|------------------------------------------|---------------------------------------------------------|--------------------------------------------------------------------------------------------|
| Maynard R.                        | Rasmussen       |                       | MD               | Division of Neonatology, University of San Diego  | San Diego, CA, USA                       | Co-Principal Investigator                               | NICHD Neonatal Research Network                                                            |
| Wade                              | Rich            |                       | BSHS RRT         | Division of Neonatology, University of San Diego  | San Diego, CA, USA                       | Research Coordinator                                    | NICHD Neonatal Research Network                                                            |
| Yvonne E.                         | Vaucher         |                       | MD MPH           | Division of Neonatology, University of San Diego  | San Diego, CA, USA                       | Follow-up Principal Investigator                        | NICHD Neonatal Research Network                                                            |
| Paul R.                           | Wozniak         |                       | MD               | Division of Neonatology, University of San Diego  | San Diego, CA, USA                       |                                                         | NICHD Neonatal Research Network                                                            |
| Janice                            | Bernhardt       |                       | MS RN            | Division of Neonatal/Perinatal Medicine           | Chapel Hill, NC, USA                     | Research Coordinator                                    | NICHD Neonatal Research Network                                                            |
| Carl L.                           | Bose            |                       | MD               | Division of Neonatal/Perinatal Medicine           | Chapel Hill, NC, USA                     | Site Investigator                                       | NICHD Neonatal Research Network                                                            |
| Gennie                            | Bose            |                       | RN               | Division of Neonatal/Perinatal Medicine           | Chapel Hill, NC, USA                     | Research Coordinator                                    | NICHD Neonatal Research Network                                                            |
| Cynthia L.                        | Clark           |                       | RN               | Division of Neonatal/Perinatal Medicine           | Chapel Hill, NC, USA                     | Research Coordinator                                    | NICHD Neonatal Research Network                                                            |
| Matthew Maxwell                   | Laughon         |                       | MD MPH           | Division of Neonatal/Perinatal Medicine           | Chapel Hill, NC, USA                     | Site Investigator                                       | NICHD Neonatal Research Network                                                            |
| Diane D.                          | Warner          |                       | MD MPH           | Division of Neonatal/Perinatal Medicine           | Chapel Hill, NC, USA                     | Follow-up Principal Investigator                        | NICHD Neonatal Research Network                                                            |
| Janice Kay                        | Wereszczak      |                       | CPNP-AC/P        | Division of Neonatal/Perinatal Medicine           | Chapel Hill, NC, USA                     | Follow-up Examiner                                      | NICHD Neonatal Research Network                                                            |
| Conra                             | Backstrom Lacy  |                       | RN               | University of New Mexico Health Sciences Center   | Albuquerque, NM, USA                     | Research Coordinator                                    | NICHD Neonatal Research Network                                                            |
| Andrea F.                         | Duncan          |                       | MD MSc           | University of New Mexico Health Sciences Center   | Albuquerque, NM, USA                     | Follow-up Examiner                                      | NICHD Neonatal Research Network                                                            |
| Tara                              | Dupont          |                       | MD               | University of New Mexico Health Sciences Center   | Albuquerque, NM, USA                     |                                                         | NICHD Neonatal Research Network                                                            |
| Janell                            | Fuller          |                       | MD               | University of New Mexico Health Sciences Center   | Albuquerque, NM, USA                     | Follow-up Principal Investigator                        | NICHD Neonatal Research Network                                                            |
| Mary                              | Hanson          |                       | RN BSN           | University of New Mexico Health Sciences Center   | Albuquerque, NM, USA                     | Research Nurse                                          | NICHD Neonatal Research Network                                                            |
| Carol H.                          | Hartenberger    |                       | MPH RN           | University of New Mexico Health Sciences Center   | Albuquerque, NM, USA                     | Research Nurse                                          | NICHD Neonatal Research Network                                                            |
| Elizabeth                         | Kuan            |                       | RN BSN           | University of New Mexico Health Sciences Center   | Albuquerque, NM, USA                     | Research Nurse                                          | NICHD Neonatal Research Network                                                            |
| Jean R.                           | Low             |                       | PhD              | University of New Mexico Health Sciences Center   | Albuquerque, NM, USA                     | Follow-up Examiner                                      | NICHD Neonatal Research Network                                                            |
| Robin K.                          | Ohls            |                       | MD               | University of New Mexico Health Sciences Center   | Albuquerque, NM, USA                     | Co-Principal Investigator                               | NICHD Neonatal Research Network                                                            |
| Lu-Ann                            | Papile          |                       | MD               | University of New Mexico Health Sciences Center   | Albuquerque, NM, USA                     | Co-Principal Investigator                               | NICHD Neonatal Research Network                                                            |
| Sandra                            | Sundquist Beaun |                       | MSN RNC-PC       | University of New Mexico Health Sciences Center   | Albuquerque, NM, USA                     | Research Coordinator                                    | NICHD Neonatal Research Network                                                            |
| Rebecca A.                        | Thomson         |                       | RN BSN           | University of New Mexico Health Sciences Center   | Albuquerque, NM, USA                     | Follow-up Coordinator                                   | NICHD Neonatal Research Network                                                            |
| Kristi L.                         | Watterberg      |                       | MD               | University of New Mexico Health Sciences Center   | Albuquerque, NM, USA                     | Principal Investigator                                  | NICHD Neonatal Research Network                                                            |
| John                              | Barks           |                       | MD               | Department of Neonatal-Perinatal Medicine         | Ann Arbor, MI, USA                       | Site Investigator                                       | NICHD Neonatal Research Network                                                            |
| Martha D.                         | Carlson         |                       | MD PhD           | Department of Neonatal-Perinatal Medicine         | Ann Arbor, MI, USA                       | Site Investigator                                       | NICHD Neonatal Research Network                                                            |
| Mary K.                           | Christensen     |                       | BA RRT           | Department of Neonatal-Perinatal Medicine         | Ann Arbor, MI, USA                       | Research Coordinator                                    | NICHD Neonatal Research Network                                                            |
| Stephanie A.                      | Wiggins         |                       | MS               | Department of Neonatal-Perinatal Medicine         | Ann Arbor, MI, USA                       | Research Coordinator                                    | NICHD Neonatal Research Network                                                            |
| Subrata                           | Sarkar          |                       | MD               | Department of Neonatal-Perinatal Medicine         | Ann Arbor, MI, USA                       | Co-Principal Investigator                               | NICHD Neonatal Research Network                                                            |
| Shawna                            | Baker           |                       | RN               | Department of Pediatrics, Division of Neonatology | Salt Lake City, UT, USA                  | Follow-up Coordinator                                   | NICHD Neonatal Research Network                                                            |
| Mariana                           | Baserga         |                       | MD MSCI          | Department of Pediatrics, Division of Neonatology | Salt Lake City, UT, USA                  | Co-Principal Investigator                               | NICHD Neonatal Research Network                                                            |
| Karie                             | Bird            |                       | RN BSN           | Department of Pediatrics, Division of Neonatology | Salt Lake City, UT, USA                  |                                                         | NICHD Neonatal Research Network                                                            |
| Jill                              | Burnett         |                       | RNC BSN          | Department of Pediatrics, Division of Neonatology | Salt Lake City, UT, USA                  | Research Nurse                                          | NICHD Neonatal Research Network                                                            |

## Supplemental Online Content: Nonauthor Collaborators

\*First name, last name, and suffix (if applicable) are required and will appear in PubMed.

| *First Name and Middle Initial(s) | *Last Name   | *Suffix (eg, Jr, III) | Academic Degrees | Institution                           | Location (city, state/province, country) | Role or Contribution, eg, chair, principal investigator | Group (if more than 1 Group listed in the byline) and/or Subgroup (eg, Steering Committee) |
|-----------------------------------|--------------|-----------------------|------------------|---------------------------------------|------------------------------------------|---------------------------------------------------------|--------------------------------------------------------------------------------------------|
| Susan                             | Christensen  |                       | RNC BSN          | Department of Pediatrics, Division of | Salt Lake City, UT, USA                  | Research Nurse                                          | NICHD Neonatal Research Network                                                            |
| Laura                             | Cole Bledsoe |                       | RN               | Department of Pediatrics, Division of | Salt Lake City, UT, USA                  |                                                         | NICHD Neonatal Research Network                                                            |
| Sean D.                           | Cunningham   |                       | PhD              | Department of Pediatrics, Division of | Salt Lake City, UT, USA                  | Follow-up Examiner                                      | NICHD Neonatal Research Network                                                            |
| Brandy                            | Davis        |                       | RN BSN           | Department of Pediatrics, Division of | Salt Lake City, UT, USA                  | Research Nurse                                          | NICHD Neonatal Research Network                                                            |
| Jennifer O.                       | Elmont       |                       | RN BSN           | Department of Pediatrics, Division of | Salt Lake City, UT, USA                  | Research Nurse                                          | NICHD Neonatal Research Network                                                            |
| Roger G.                          | Faix         |                       | MD               | Department of Pediatrics, Division of | Salt Lake City, UT, USA                  | Principal Investigator                                  | NICHD Neonatal Research Network                                                            |
| Becky                             | Hall         |                       | APRN             | Department of Pediatrics, Division of | Salt Lake City, UT, USA                  |                                                         | NICHD Neonatal Research Network                                                            |
| Erika R.                          | Jensen       |                       | APRN             | Department of Pediatrics, Division of | Salt Lake City, UT, USA                  |                                                         | NICHD Neonatal Research Network                                                            |
| Jennifer J.                       | Jensen       |                       | RN BSN           | Department of Pediatrics, Division of | Salt Lake City, UT, USA                  | Research Nurse                                          | NICHD Neonatal Research Network                                                            |
| Jamie                             | Jordan       |                       | RN BSN           | Department of Pediatrics, Division of | Salt Lake City, UT, USA                  | Research Nurse                                          | NICHD Neonatal Research Network                                                            |
| Manndi C.                         | Loertscher   |                       | BS CCRP          | Department of Pediatrics, Division of | Salt Lake City, UT, USA                  | Research Assistant                                      | NICHD Neonatal Research Network                                                            |
| Trisha                            | Marchant     |                       | RN BSN           | Department of Pediatrics, Division of | Salt Lake City, UT, USA                  | Research Nurse                                          | NICHD Neonatal Research Network                                                            |
| Earl                              | Maxson       |                       | BSN              | Department of Pediatrics, Division of | Salt Lake City, UT, USA                  | Research Nurse                                          | NICHD Neonatal Research Network                                                            |
| Kandace M.                        | McGrath      |                       | BS               | Department of Pediatrics, Division of | Salt Lake City, UT, USA                  | Research Assistant                                      | NICHD Neonatal Research Network                                                            |
| Stephen D.                        | Minton       |                       | MD               | Department of Pediatrics, Division of | Salt Lake City, UT, USA                  | Site Investigator                                       | NICHD Neonatal Research Network                                                            |
| Galina                            | Morshedzadeh |                       | BSN APRN         | Department of Pediatrics, Division of | Salt Lake City, UT, USA                  |                                                         | NICHD Neonatal Research Network                                                            |
| Karen A.                          | Osborne      |                       | RN BSN CC        | Department of Pediatrics, Division of | Salt Lake City, UT, USA                  | Research Coordinator                                    | NICHD Neonatal Research Network                                                            |
| D. Melody                         | Parry        |                       | RN BSN           | Department of Pediatrics, Division of | Salt Lake City, UT, USA                  | Research Nurse                                          | NICHD Neonatal Research Network                                                            |
| Carrie A.                         | Rau          |                       | RN BSN CC        | Department of Pediatrics, Division of | Salt Lake City, UT, USA                  | Research Coordinator                                    | NICHD Neonatal Research Network                                                            |
| Brixen A.                         | Reich        |                       | MSN RNC C        | Department of Pediatrics, Division of | Salt Lake City, UT, USA                  |                                                         | NICHD Neonatal Research Network                                                            |
| Susan T.                          | Schaefer     |                       | RRT RN BSN       | Department of Pediatrics, Division of | Salt Lake City, UT, USA                  | Research Nurse                                          | NICHD Neonatal Research Network                                                            |
| Mark J.                           | Sheffield    |                       | MD               | Department of Pediatrics, Division of | Salt Lake City, UT, USA                  | Site Investigator                                       | NICHD Neonatal Research Network                                                            |
| Cynthia                           | Spencer      |                       | RNC BSN          | Department of Pediatrics, Division of | Salt Lake City, UT, USA                  | Research Nurse                                          | NICHD Neonatal Research Network                                                            |
| Michael                           | Steffen      |                       | PhD              | Department of Pediatrics, Division of | Salt Lake City, UT, USA                  | Follow-up Examiner                                      | NICHD Neonatal Research Network                                                            |
| Kelly                             | Stout        |                       | PhD              | Department of Pediatrics, Division of | Salt Lake City, UT, USA                  |                                                         | NICHD Neonatal Research Network                                                            |
| Ashley L.                         | Stuart       |                       | PhD              | Department of Pediatrics, Division of | Salt Lake City, UT, USA                  |                                                         | NICHD Neonatal Research Network                                                            |
| Katherine                         | Tice         |                       | RN BSN           | Department of Pediatrics, Division of | Salt Lake City, UT, USA                  | Research Nurse                                          | NICHD Neonatal Research Network                                                            |
| Kimberlee                         | Weaver-Lewis |                       | RN MS            | Department of Pediatrics, Division of | Salt Lake City, UT, USA                  | Research Nurse                                          | NICHD Neonatal Research Network                                                            |
| Sarah                             | Winter       |                       | MD               | Department of Pediatrics, Division of | Salt Lake City, UT, USA                  | Follow-up Examiner                                      | NICHD Neonatal Research Network                                                            |
| Kathryn D.                        | Woodbury     |                       | RN BSN           | Department of Pediatrics, Division of | Salt Lake City, UT, USA                  | Research Nurse                                          | NICHD Neonatal Research Network                                                            |
| Bradley A.                        | Yoder        |                       | MD               | Department of Pediatrics, Division of | Salt Lake City, UT, USA                  | Principal Investigator                                  | NICHD Neonatal Research Network                                                            |
| Karen                             | Zanetti      |                       | RN               | Department of Pediatrics, Division of | Salt Lake City, UT, USA                  |                                                         | NICHD Neonatal Research Network                                                            |
| Korinne                           | Chiu         |                       | MA               | Wake Forest University School of Me   | Winston-Salem, NC, USA                   | Follow-up Examiner                                      | NICHD Neonatal Research Network                                                            |

## Supplemental Online Content: Nonauthor Collaborators

\*First name, last name, and suffix (if applicable) are required and will appear in PubMed.

| *First Name and Middle Initial(s) | *Last Name      | *Suffix (eg, Jr, III) | Academic Degrees | Institution                           | Location (city, state/province, country) | Role or Contribution, eg, chair, principal investigator | Group (if more than 1 Group listed in the byline) and/or Subgroup (eg, Steering Committee) |
|-----------------------------------|-----------------|-----------------------|------------------|---------------------------------------|------------------------------------------|---------------------------------------------------------|--------------------------------------------------------------------------------------------|
| Robert G.                         | Dillard         |                       | MD               | Wake Forest University School of Me   | Winston-Salem, NC, USA                   | Follow-up Principal Inv                                 | NICHD Neonatal Research Network                                                            |
| Deborah                           | Evans Allred    |                       | MA LPA           | Wake Forest University School of Me   | Winston-Salem, NC, USA                   | Follow-up Examiner                                      | NICHD Neonatal Research Network                                                            |
| Donald J.                         | Goldstein       |                       | PhD              | Wake Forest University School of Me   | Winston-Salem, NC, USA                   | Follow-up Examiner                                      | NICHD Neonatal Research Network                                                            |
| Raquel                            | Halfond         |                       | MA               | Wake Forest University School of Me   | Winston-Salem, NC, USA                   | Follow-up Examiner                                      | NICHD Neonatal Research Network                                                            |
| Barbara G.                        | Jackson         |                       | RN BSN           | Wake Forest University School of Me   | Winston-Salem, NC, USA                   | Follow-up Coordinator                                   | NICHD Neonatal Research Network                                                            |
| T. Michael                        | O'Shea          |                       | MD MPH           | Wake Forest University School of Me   | Winston-Salem, NC, USA                   | Principal Investigator                                  | NICHD Neonatal Research Network                                                            |
| Nancy J.                          | Peters          |                       | RN CCRP          | Wake Forest University School of Me   | Winston-Salem, NC, USA                   | Research Coordinator                                    | NICHD Neonatal Research Network                                                            |
| Carroll                           | Peterson        |                       | MA               | Wake Forest University School of Me   | Winston-Salem, NC, USA                   | Follow-up Examiner                                      | NICHD Neonatal Research Network                                                            |
| Ellen L.                          | Waldrep         |                       | MS               | Wake Forest University School of Me   | Winston-Salem, NC, USA                   | Follow-up Examiner                                      | NICHD Neonatal Research Network                                                            |
| Lisa K.                           | Washburn        |                       | MD               | Wake Forest University School of Me   | Winston-Salem, NC, USA                   | Follow-up Principal Inv                                 | NICHD Neonatal Research Network                                                            |
| Cherrie D.                        | Welch           |                       | MD MPH           | Wake Forest University School of Me   | Winston-Salem, NC, USA                   | Follow-up Examiner                                      | NICHD Neonatal Research Network                                                            |
| Melissa                           | Whalen Morris   |                       | MA               | Wake Forest University School of Me   | Winston-Salem, NC, USA                   | Follow-up Examiner                                      | NICHD Neonatal Research Network                                                            |
| Gail                              | Wiley Hounshell |                       | PhD              | Wake Forest University School of Me   | Winston-Salem, NC, USA                   | Follow-up Examiner                                      | NICHD Neonatal Research Network                                                            |
| Stephen D.                        | Kicklighter     |                       | MD               | Department of Pediatrics, Division of | Raleigh, NC, USA                         | Site Investigator                                       | NICHD Neonatal Research Network                                                            |
| Ginger                            | Rhodes-Ryan     |                       | ARNP MSN         | Department of Pediatrics, Division of | Raleigh, NC, USA                         | Research Coordinator                                    | NICHD Neonatal Research Network                                                            |
| Donna                             | White           |                       | RN-BC BSN        | Department of Pediatrics, Division of | Raleigh, NC, USA                         | Research Nurse                                          | NICHD Neonatal Research Network                                                            |
| Katherine                         | Abramczyk       |                       |                  | Department of Pediatrics, Wayne Sta   | Detroit, MI, USA                         | Research Coordinator                                    | NICHD Neonatal Research Network                                                            |
| Prashant                          | Agarwal         |                       | MD               | Department of Pediatrics, Wayne Sta   | Detroit, MI, USA                         | Site Investigator                                       | NICHD Neonatal Research Network                                                            |
| Monika                            | Bajaj           |                       | MD               | Department of Pediatrics, Wayne Sta   | Detroit, MI, USA                         |                                                         | NICHD Neonatal Research Network                                                            |
| Rebecca                           | Bara            |                       | RN BSN           | Department of Pediatrics, Wayne Sta   | Detroit, MI, USA                         | Research Coordinator                                    | NICHD Neonatal Research Network                                                            |
| Elizabeth                         | Billian         |                       | RN MBA           | Department of Pediatrics, Wayne Sta   | Detroit, MI, USA                         | Research Coordinator                                    | NICHD Neonatal Research Network                                                            |
| Sanjay                            | Chawla          |                       | MD               | Department of Pediatrics, Wayne Sta   | Detroit, MI, USA                         | Co-Principal Investigat                                 | NICHD Neonatal Research Network                                                            |
| Kirsten                           | Childs          |                       | RN BSN           | Department of Pediatrics, Wayne Sta   | Detroit, MI, USA                         | Research Nurse                                          | NICHD Neonatal Research Network                                                            |
| Lilia C.                          | De Jesus        |                       | MD               | Department of Pediatrics, Wayne Sta   | Detroit, MI, USA                         |                                                         | NICHD Neonatal Research Network                                                            |
| Debra                             | Driscoll        |                       | RN BSN           | Department of Pediatrics, Wayne Sta   | Detroit, MI, USA                         |                                                         | NICHD Neonatal Research Network                                                            |
| Melissa                           | February        |                       | MD               | Department of Pediatrics, Wayne Sta   | Detroit, MI, USA                         |                                                         | NICHD Neonatal Research Network                                                            |
| Laura A.                          | Goldston        |                       | MA               | Department of Pediatrics, Wayne Sta   | Detroit, MI, USA                         | Follow-up Examiner                                      | NICHD Neonatal Research Network                                                            |
| Mary E.                           | Johnson         |                       | RN BSN           | Department of Pediatrics, Wayne Sta   | Detroit, MI, USA                         | Research Nurse                                          | NICHD Neonatal Research Network                                                            |
| Geraldine                         | Muran           |                       | RN BSN           | Department of Pediatrics, Wayne Sta   | Detroit, MI, USA                         | Research Coordinator                                    | NICHD Neonatal Research Network                                                            |
| Girija                            | Natarajan       |                       | MD               | Department of Pediatrics, Wayne Sta   | Detroit, MI, USA                         | Principal Investigator                                  | NICHD Neonatal Research Network                                                            |
| Bogdan                            | Panaitescu      |                       | MD PhD           | Department of Pediatrics, Wayne Sta   | Detroit, MI, USA                         | Site Investigator                                       | NICHD Neonatal Research Network                                                            |
| Athina                            | Pappas          |                       | MD               | Department of Pediatrics, Wayne Sta   | Detroit, MI, USA                         | Follow-up Principal Inv                                 | NICHD Neonatal Research Network                                                            |
| Jeannette E.                      | Prentice        |                       | MD               | Department of Pediatrics, Wayne Sta   | Detroit, MI, USA                         |                                                         | NICHD Neonatal Research Network                                                            |

Supplemental Online Content: Nonauthor Collaborators

\*First name, last name, and suffix (if applicable) are required and will appear in PubMed.

| *First Name and Middle Initial(s) | *Last Name  | *Suffix (eg, Jr, III) | Academic Degrees | Institution                          | Location (city, state/province, country) | Role or Contribution, eg, chair, principal investigator | Group (if more than 1 Group listed in the byline) and/or Subgroup (eg, Steering Committee) |
|-----------------------------------|-------------|-----------------------|------------------|--------------------------------------|------------------------------------------|---------------------------------------------------------|--------------------------------------------------------------------------------------------|
| Seetha                            | Shankaran   |                       | MD               | Department of Pediatrics, Wayne Sta  | Detroit, MI, USA                         | Principal Investigator                                  | NICHD Neonatal Research Network                                                            |
| Beena G.                          | Sood        |                       | MD MS            | Department of Pediatrics, Wayne Sta  | Detroit, MI, USA                         | Co-Principal Investigator                               | NICHD Neonatal Research Network                                                            |
| Diane F.                          | White       |                       | RRT CCRP         | Department of Pediatrics, Wayne Sta  | Detroit, MI, USA                         | Research Nurse                                          | NICHD Neonatal Research Network                                                            |
| Eunice                            | Woldt       |                       | RN MSN           | Department of Pediatrics, Wayne Sta  | Detroit, MI, USA                         |                                                         | NICHD Neonatal Research Network                                                            |
| Christine G.                      | Butler      |                       | MD               | Department of Pediatrics, Yale Unive | New Haven, CT, USA                       | Follow-up Coordinator                                   | NICHD Neonatal Research Network                                                            |
| Patricia                          | Cervone     |                       | RN               | Department of Pediatrics, Yale Unive | New Haven, CT, USA                       | Research Coordinator                                    | NICHD Neonatal Research Network                                                            |
| Richard A.                        | Ehrenkranz  |                       | MD               | Department of Pediatrics, Yale Unive | New Haven, CT, USA                       | Principal Investigator (                                | NICHD Neonatal Research Network                                                            |
| Patricia                          | Gettner     |                       | RN               | Department of Pediatrics, Yale Unive | New Haven, CT, USA                       | Research Coordinator                                    | NICHD Neonatal Research Network                                                            |
| Sheila                            | Greisman    |                       | RN               | Department of Pediatrics, Yale Unive | New Haven, CT, USA                       | Follow-up Coordinator                                   | NICHD Neonatal Research Network                                                            |
| Harris C.                         | Jacobs      |                       | MD               | Department of Pediatrics, Yale Unive | New Haven, CT, USA                       | Site Investigator                                       | NICHD Neonatal Research Network                                                            |
| Monica                            | Konstantino |                       | RN BSN           | Department of Pediatrics, Yale Unive | New Haven, CT, USA                       | Research Coordinator                                    | NICHD Neonatal Research Network                                                            |
| JoAnn                             | Poulsen     |                       | RN               | Department of Pediatrics, Yale Unive | New Haven, CT, USA                       | Research Nurse                                          | NICHD Neonatal Research Network                                                            |
| Elaine                            | Romano      |                       | MSN              | Department of Pediatrics, Yale Unive | New Haven, CT, USA                       | Follow-up Coordinator                                   | NICHD Neonatal Research Network                                                            |
| Janet                             | Taft        |                       | RN BSN           | Department of Pediatrics, Yale Unive | New Haven, CT, USA                       | Research Nurse                                          | NICHD Neonatal Research Network                                                            |
| Joanne                            | Williams    |                       | RN BSN           | Department of Pediatrics, Yale Unive | New Haven, CT, USA                       | Research Nurse                                          | NICHD Neonatal Research Network                                                            |
