# Supplementary material for: Incidence of and Neurodevelopmental Outcomes After Late-Onset Meningitis Among Children Born Extremely Preterm
Source: PubMed Central journal article supplement (PMC9856224; doi:10.1001/jamanetworkopen.2022.45826), 2022-12-08
Supplement: jamanetwopen-e2245826-s003.pdf [file jamanetwopen-e2245826-s003.pdf]

## Data Sharing Statement

Brumbaugh. Incidence of and Neurodevelopmental Outcomes After Late-Onset Meningitis Among Children Born Extremely Preterm. *JAMA Netw Open*. Published December 08, 2022. doi:10.1001/jamanetworkopen.2022.45826

### Data

**Data available:** Yes

**Data types:** Other (please specify)

**Additional Information:** Data reported in this paper may be requested through a data use agreement. Further details are available at <https://neonatal.rti.org/index.cfm?fuseaction=DataRequest.Home>.

**How to access data:** Data reported in this paper may be requested through a data use agreement. Further details are available at <https://neonatal.rti.org/index.cfm?fuseaction=DataRequest.Home>.

**When available:** With publication

### Supporting Documents

**Document types:** None

### Additional Information

**Who can access the data:** Data reported in this paper may be requested through a data use agreement. Further details are available at <https://neonatal.rti.org/index.cfm?fuseaction=DataRequest.Home>.

**Types of analyses:** Data reported in this paper may be requested through a data use agreement. Further details are available at <https://neonatal.rti.org/index.cfm?fuseaction=DataRequest.Home>.

**Mechanisms of data availability:** Data reported in this paper may be requested through a data use agreement. Further details are available at <https://neonatal.rti.org/index.cfm?fuseaction=DataRequest.Home>.
